# Supplementary material
Source: bioRxiv or medRxiv preprint supplement (https://medrxiv.org/highwire/filestream/90095/field_highwire_adjunct_files/6/2020.07.16.20155606-7.pdf)
Supplement: Supplementary file [file 2020.07.16.20155606-7.pdf]

**Supplementary Figure 1. HLA\*LA typing accuracy of all observed G-group alleles against gold-standard sequencing based typing.** The x-axis is the  $\log_{10}$ (allele frequency) observed in all 21,546 subjects. The y-axis is the accuracy of HLA\*LA inferred G-group alleles compared against the sequencing based typing. **(a)** The 288 East Asian subjects from the JPN cohort. **(b)** The 955 multi-ethnic subjects from the 1000 Genomes Project.

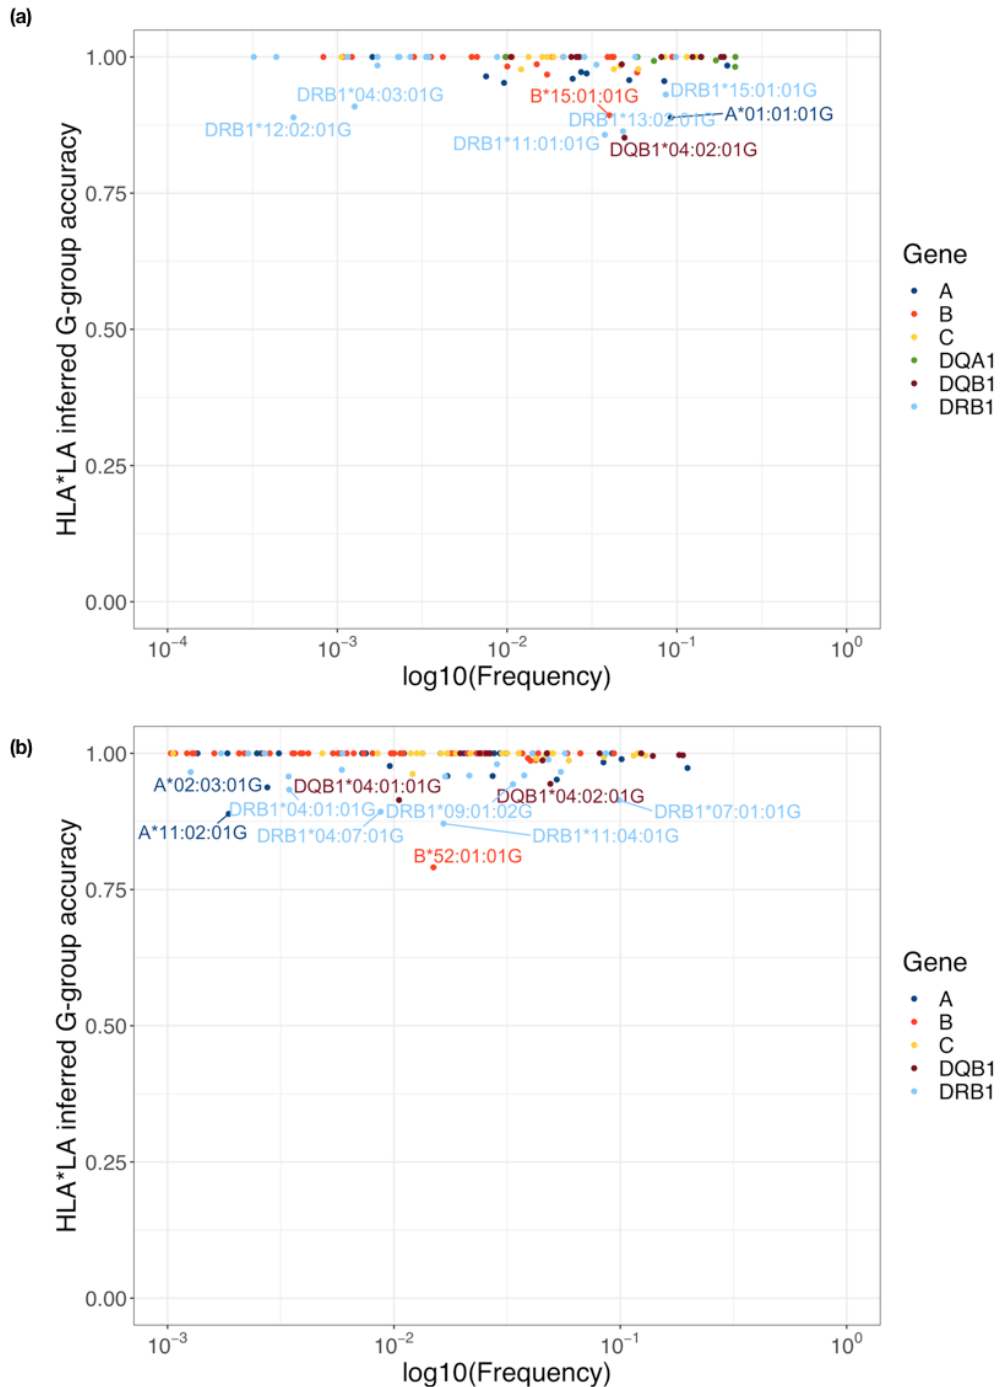

**Supplementary Figure 2. Dimension reduction of the pairwise IBD distance between 1000 Genomes samples using MHC region markers only with population labels. (a)** The first two principal components show separation of continental groups (European, African, and East Asian) as well as the admixed nature of the Latino and South Asian samples. **(b)** UMAP on the same pairwise IBD distance forms distinct clusters for all five populations.

**(a)**

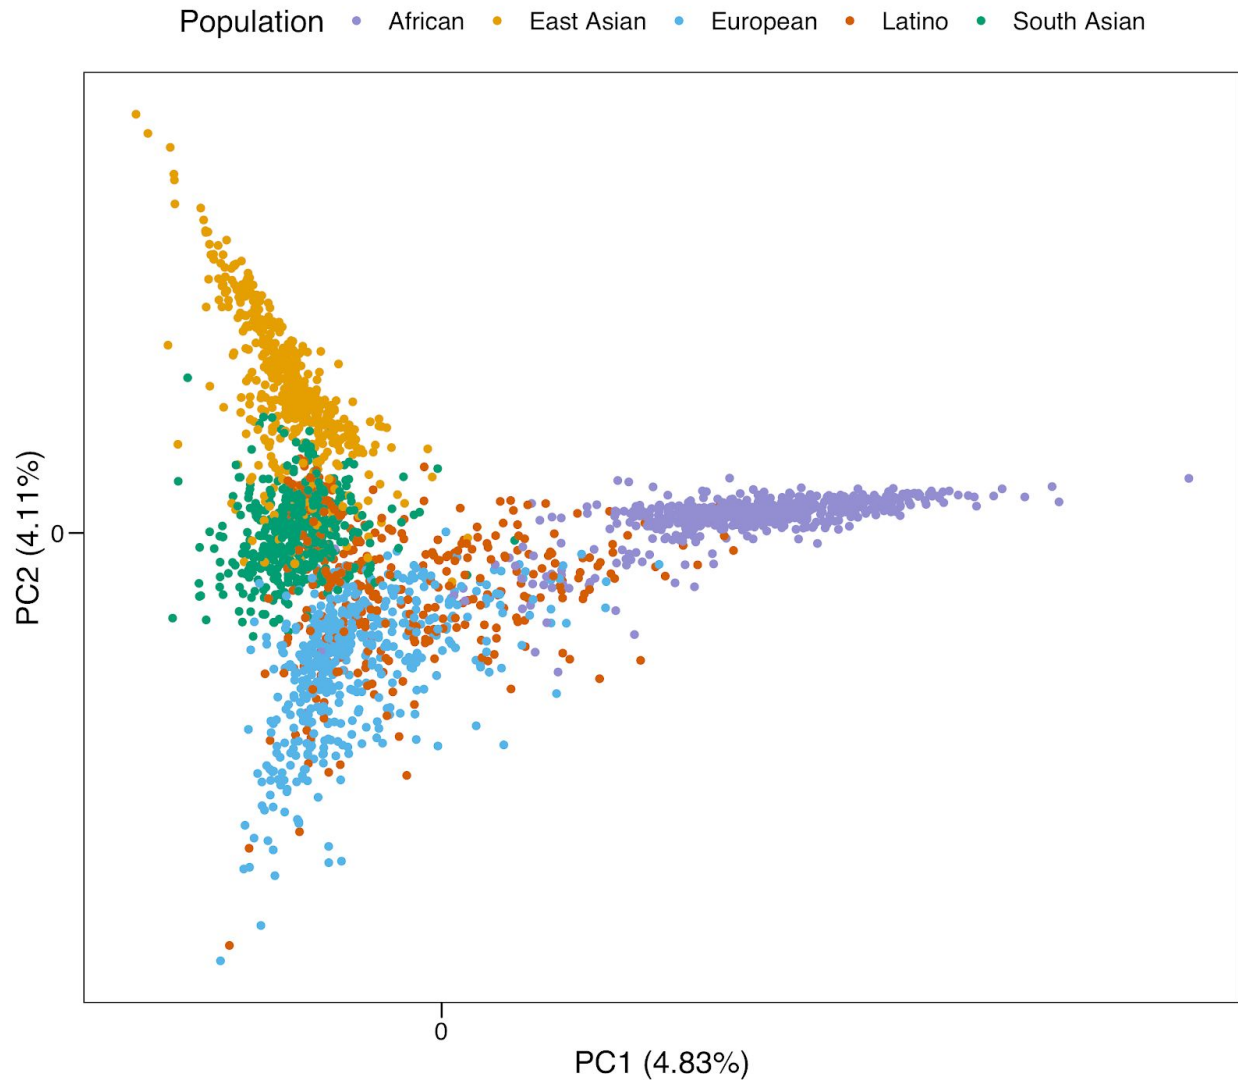

(b)

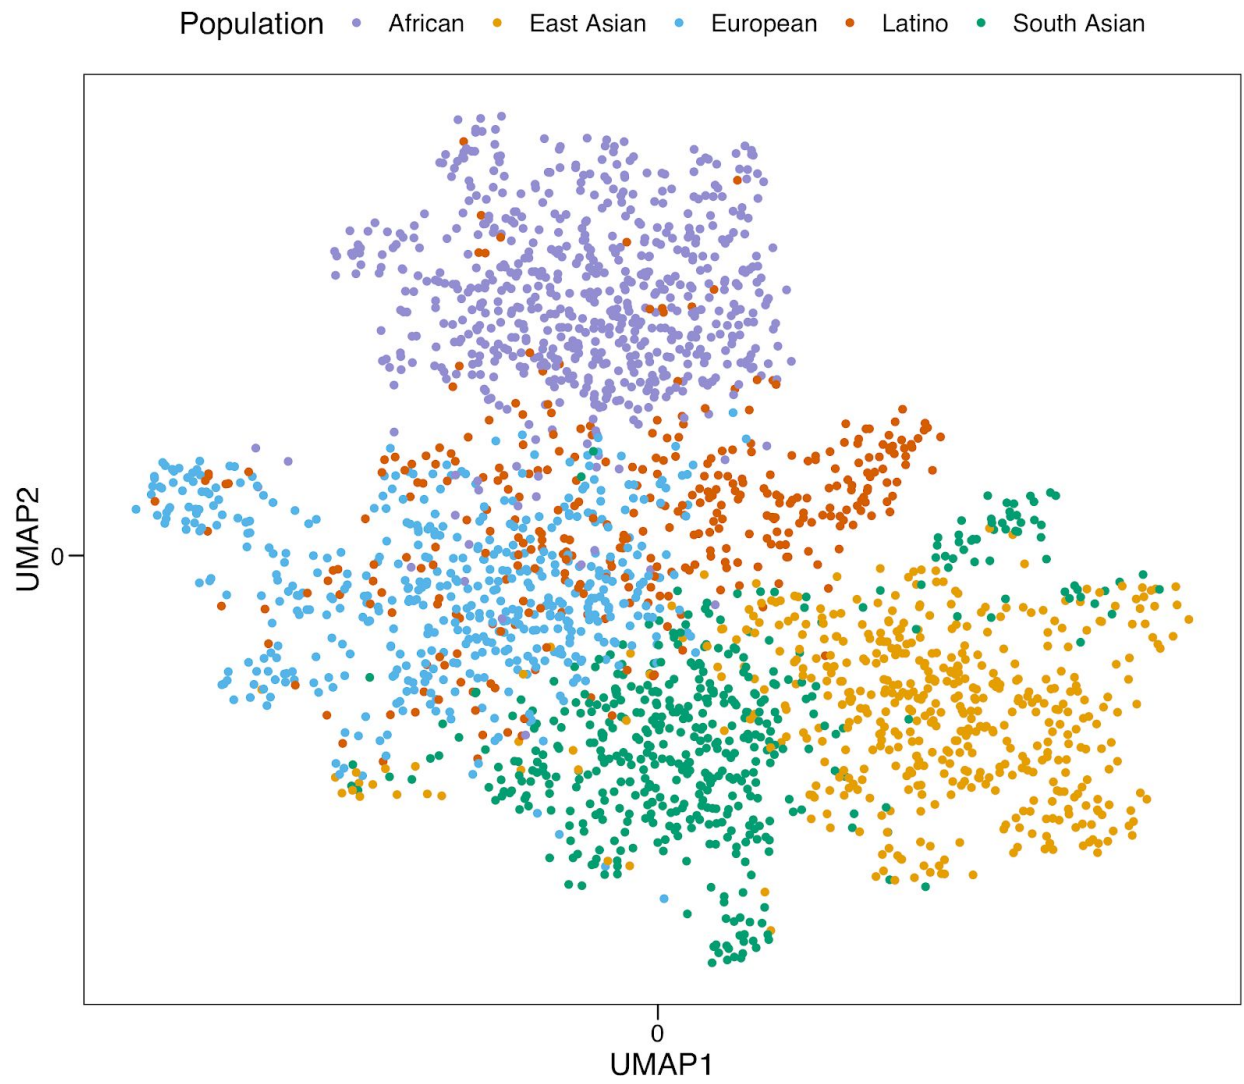

**Supplementary Figure 3. Diversity of eight classical HLA genes in the constructed multi-ethnic MHC reference panel.** Each gene is stratified by six populations (AA = Admixed African; EAS = East Asian; EUR = European; LAT = Latino; SAS = South Asian). The top two most common alleles within each classical gene of each population are plotted across all panels. Alleles that have frequencies greater than 1% are also labelled in the bar plots.

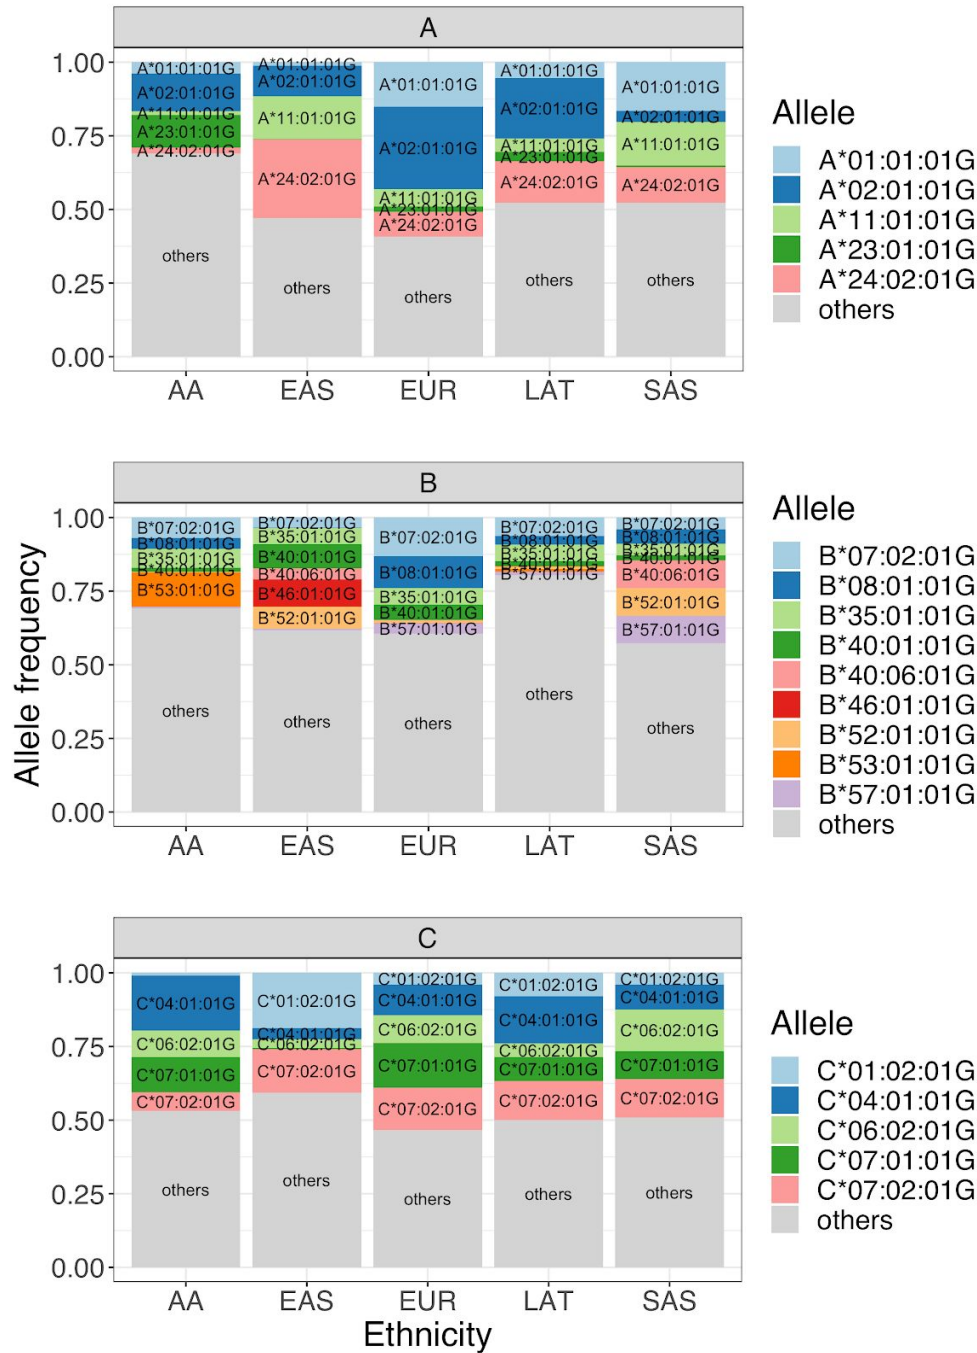

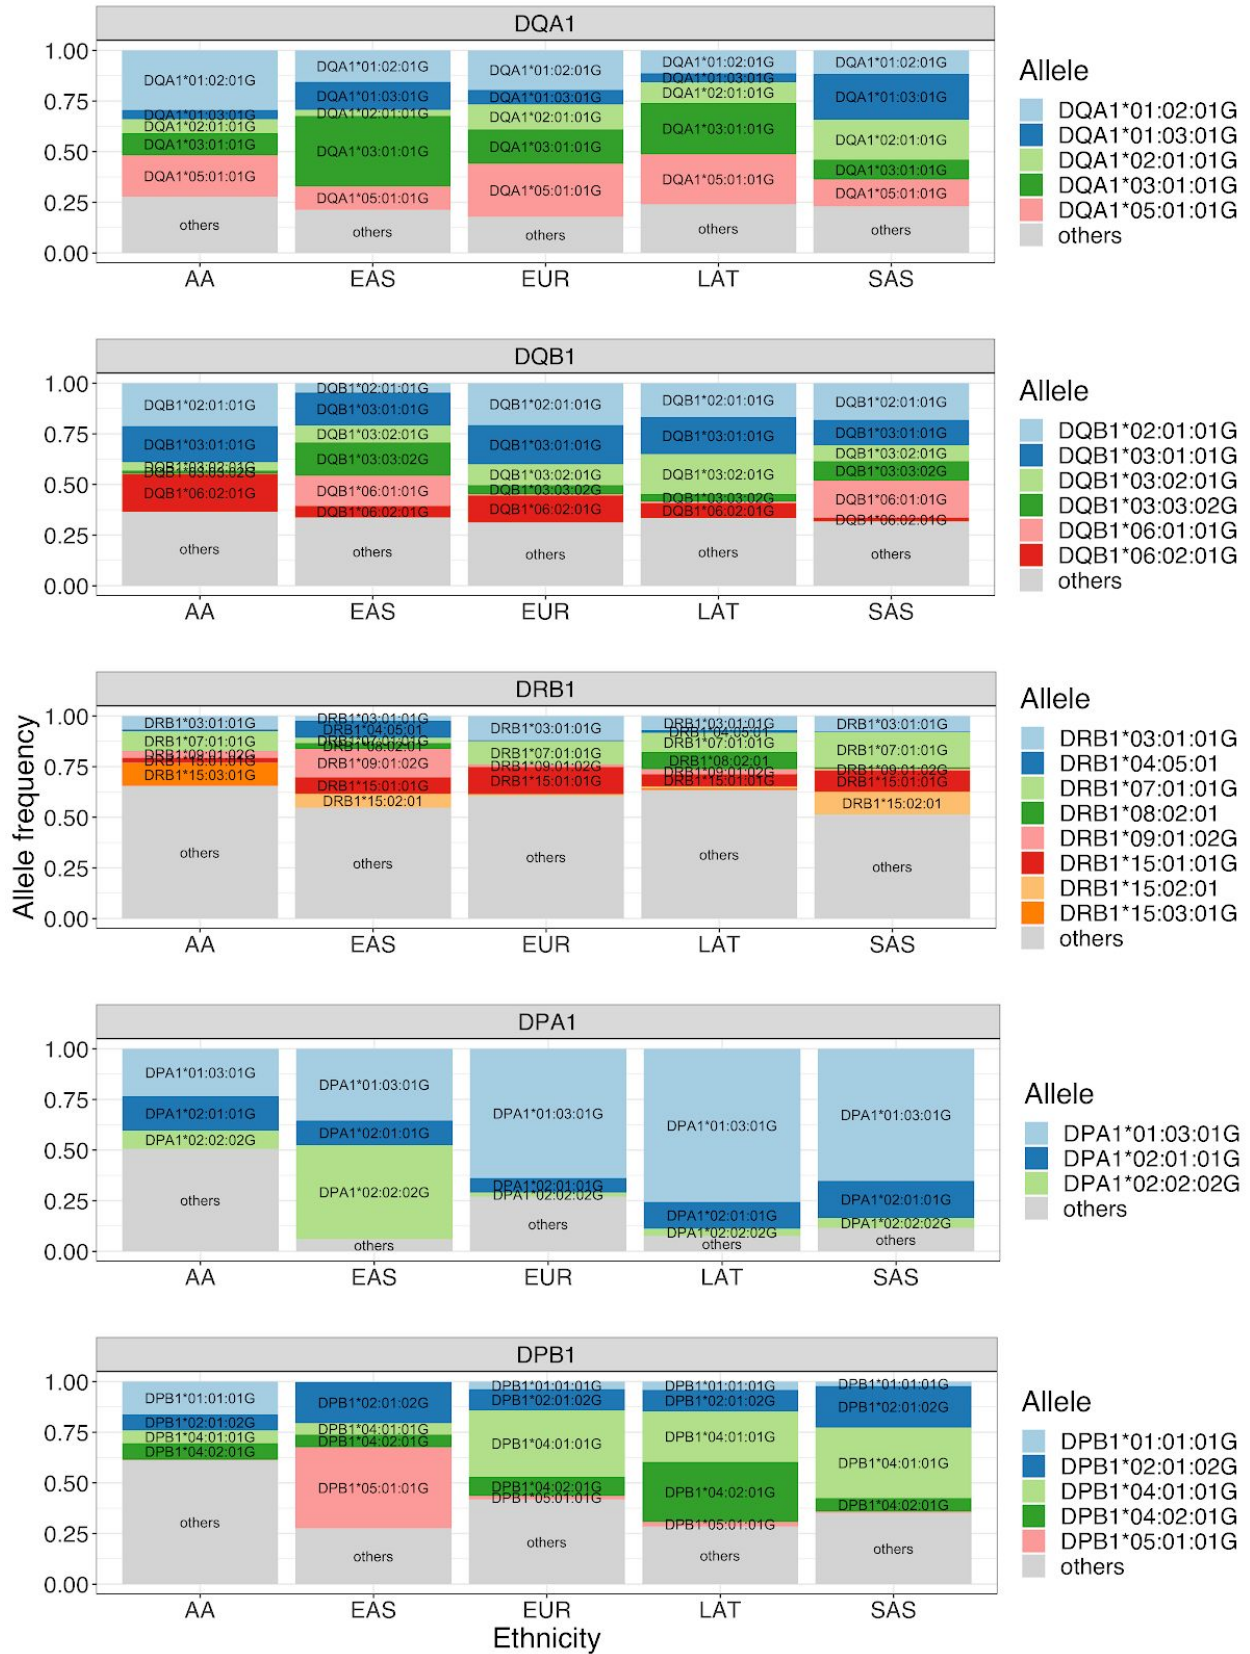



**Supplementary Figure 4. Heterogeneity of observed common G-group alleles (frequency > 1%).** The y-axis reports the ratio of the maximum frequency of a given allele among five continental populations to its overall frequency. The x-axis shows (a) the log<sub>10</sub> frequency of all G-group alleles with frequencies >1% observed in the overall population; and (b) the -log<sub>10</sub>(P-value) of chi-square statistics obtained from a 3x5 genotype contingency table.

(a)

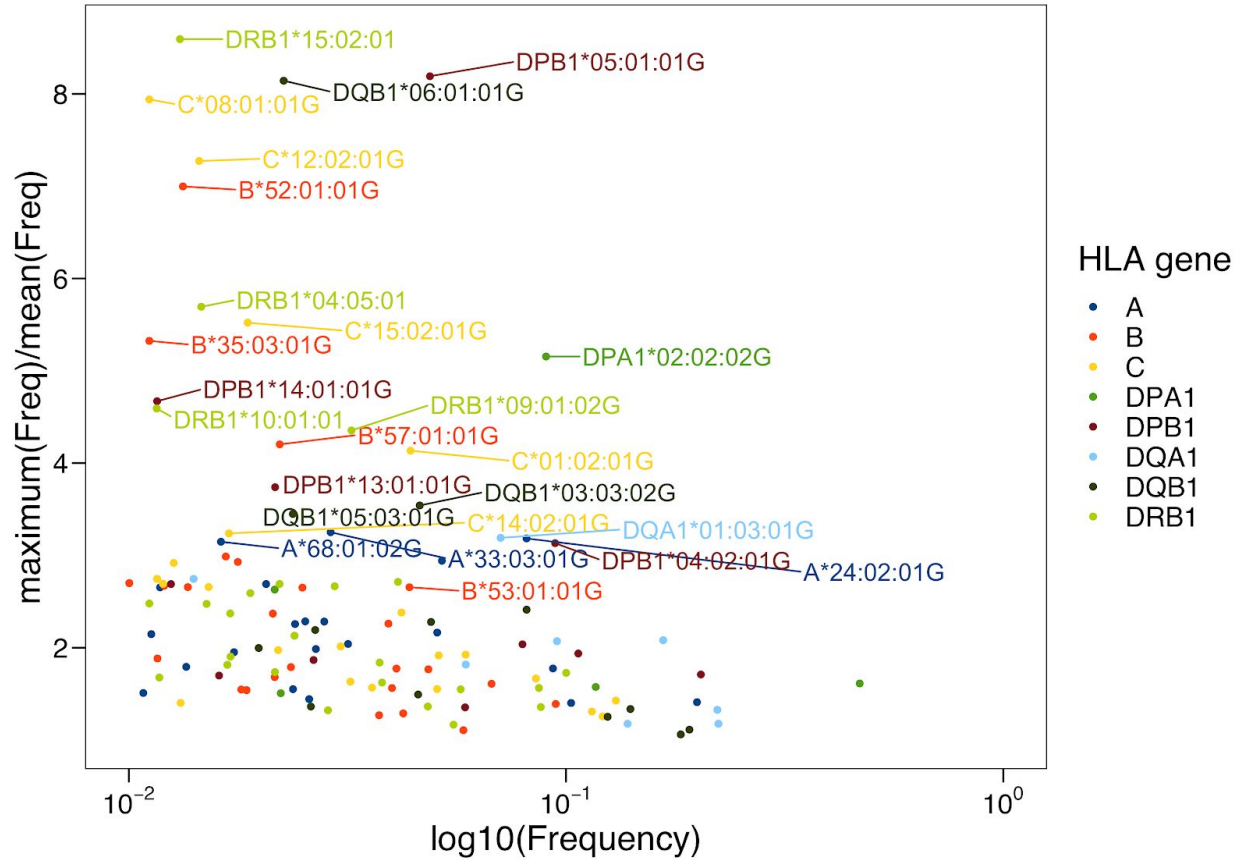

(b)

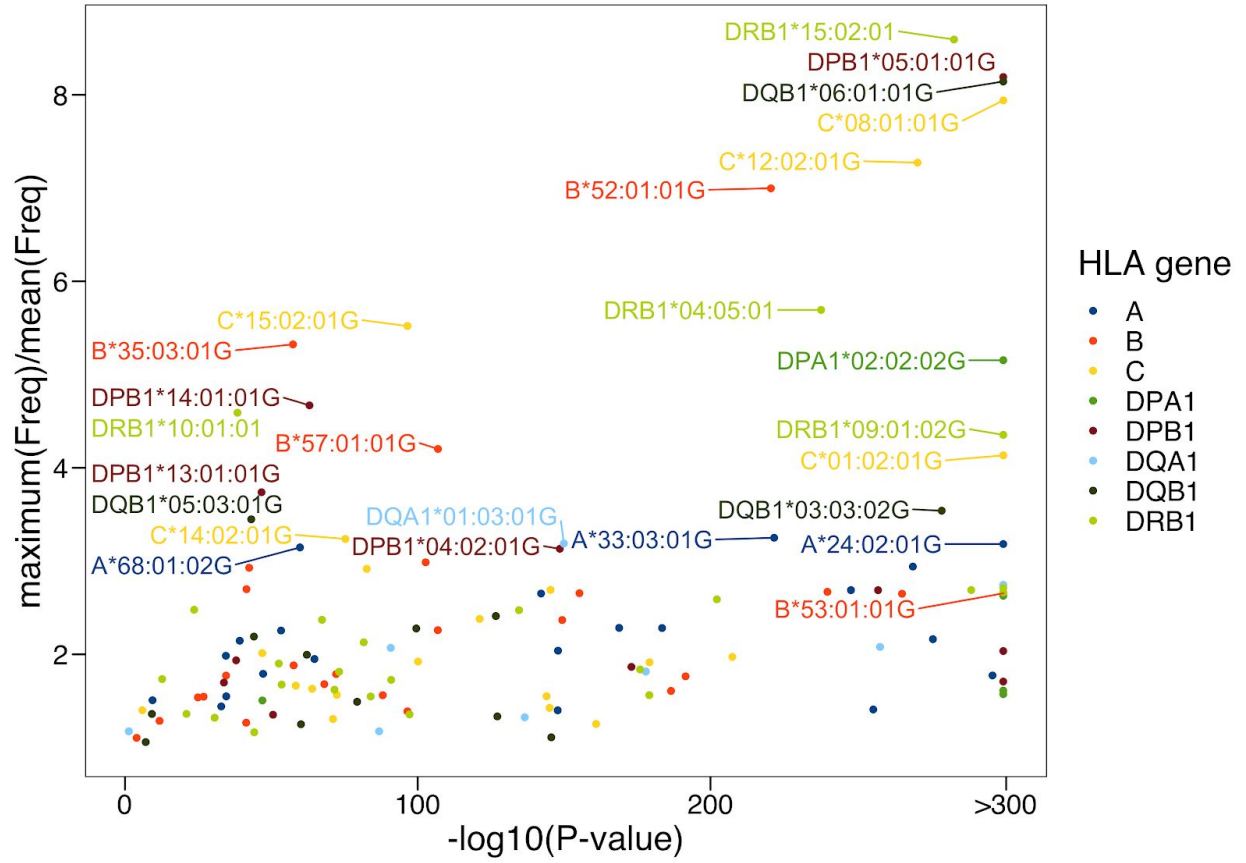

**Supplementary Figure 5. Reported G-group alleles stratified by overall frequency among 21,546 individuals.**

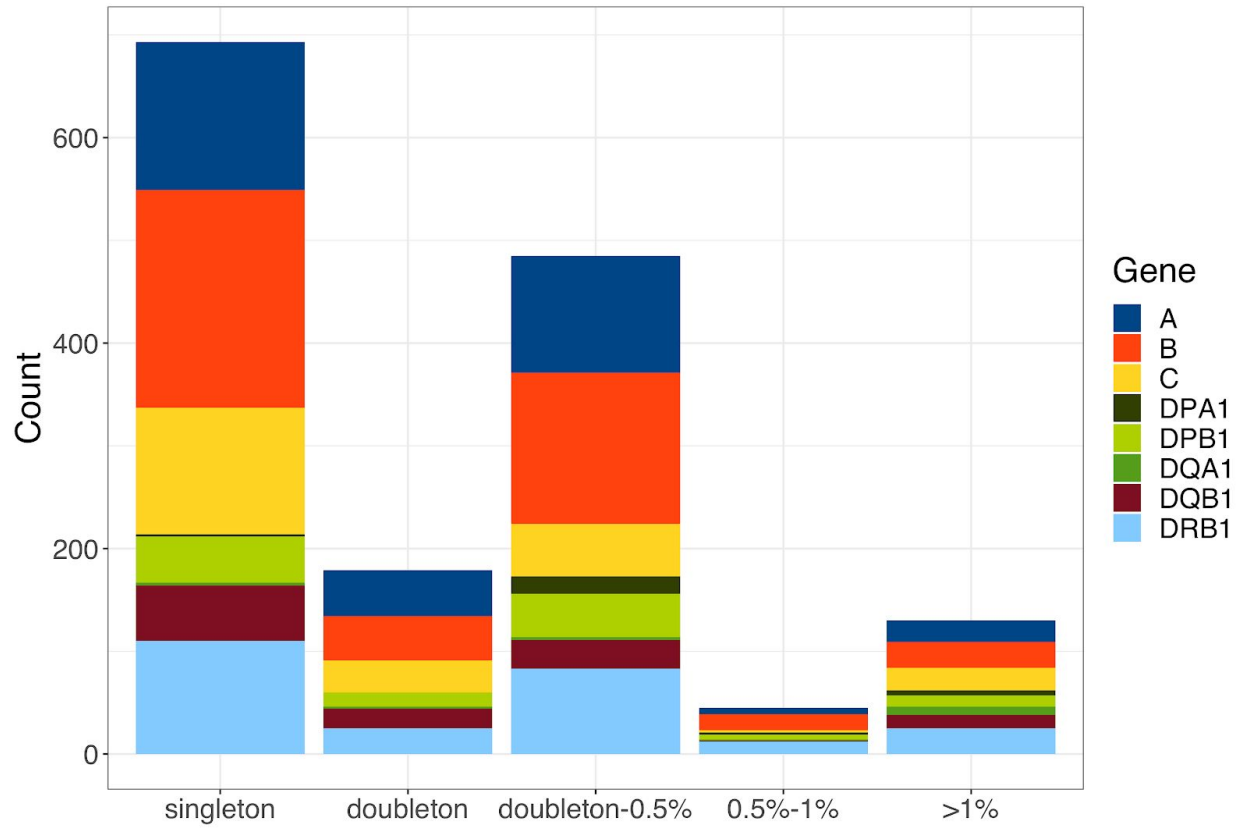



**Supplementary Figure 6. Allele diversity of eight classical *HLA* genes in global populations.** For each gene, the top five most frequent alleles across all populations are shown (light blue=most frequent; dark blue=second frequent; light green=third frequent; dark green=fourth frequent; red=fifth frequent; gray= all other alleles).

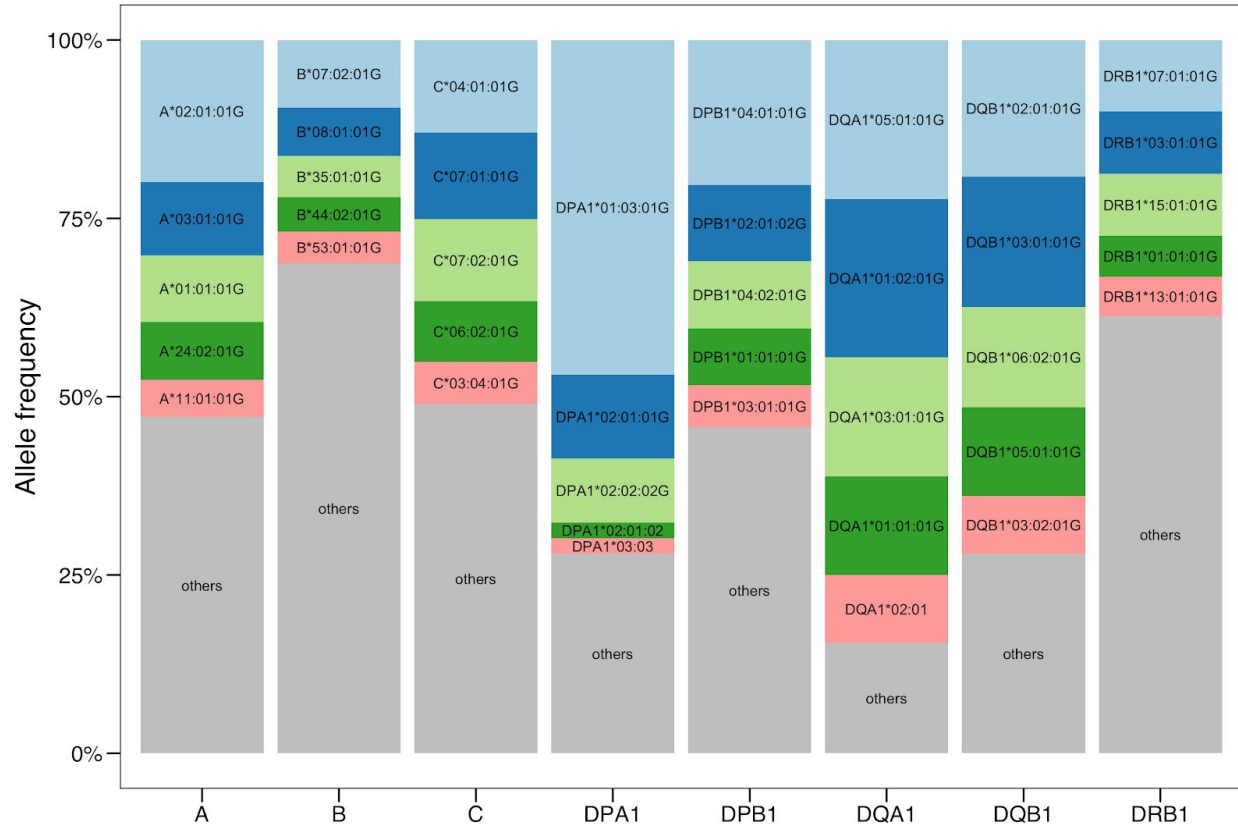

**Supplementary Figure 7. Pairwise LD measurement index,  $\epsilon$ , among five ancestral populations.** The value  $\epsilon$  evaluates the LD structures between two multiallelic variants and ranges between no LD (0) and perfect LD (1). Higher  $\epsilon$  were observed between *DQA1*, *DQB1*, and *DRB1*; between *DPA1* and *DPB1*; and between *B* and *C*.

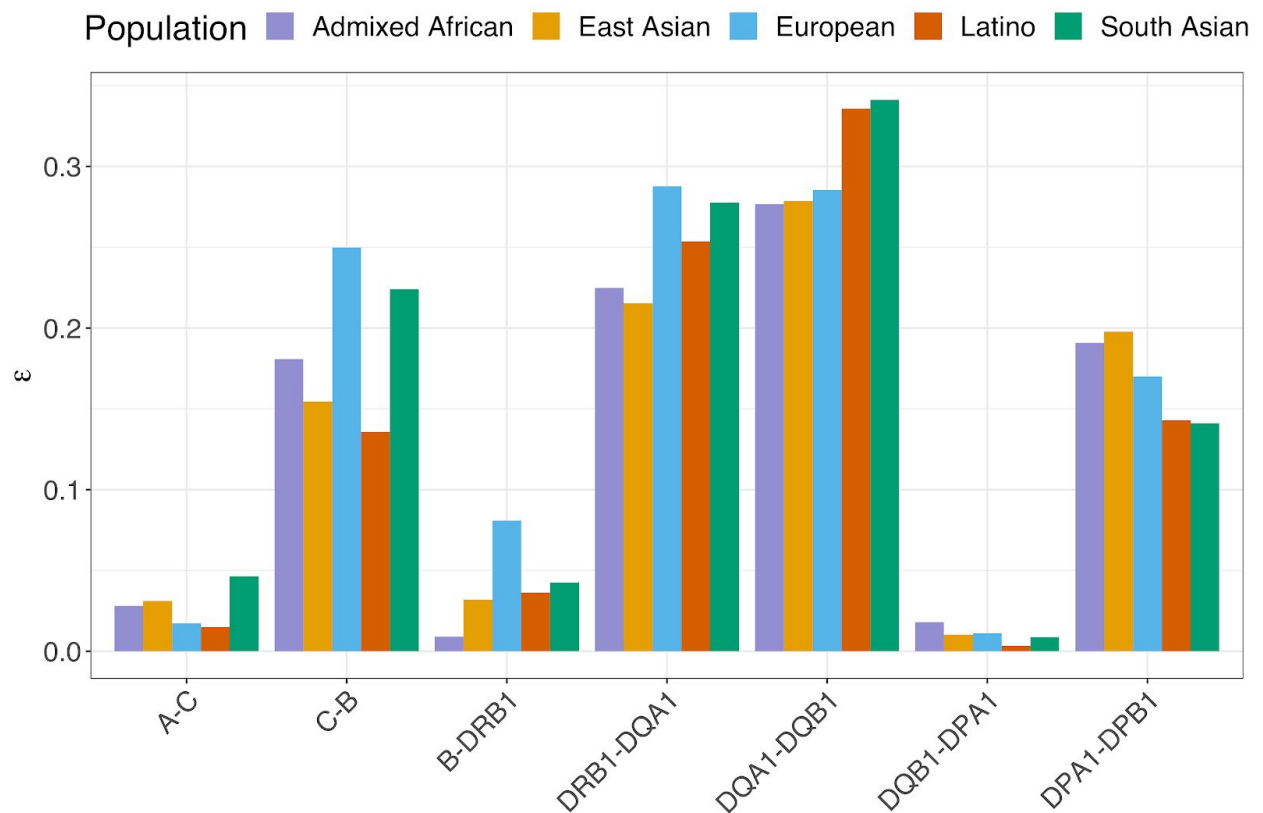

**Supplementary Figure 8. Haplotype structure for eight classical HLA genes in East Asians.** The haplotype structures of the eight classical HLA genes. The tile in a bar represents an *HLA* allele, and its height corresponds to the frequencies of the *HLA* allele. All long-range *HLA* haplotypes with frequency >1% are bolded and highlighted in yellow.

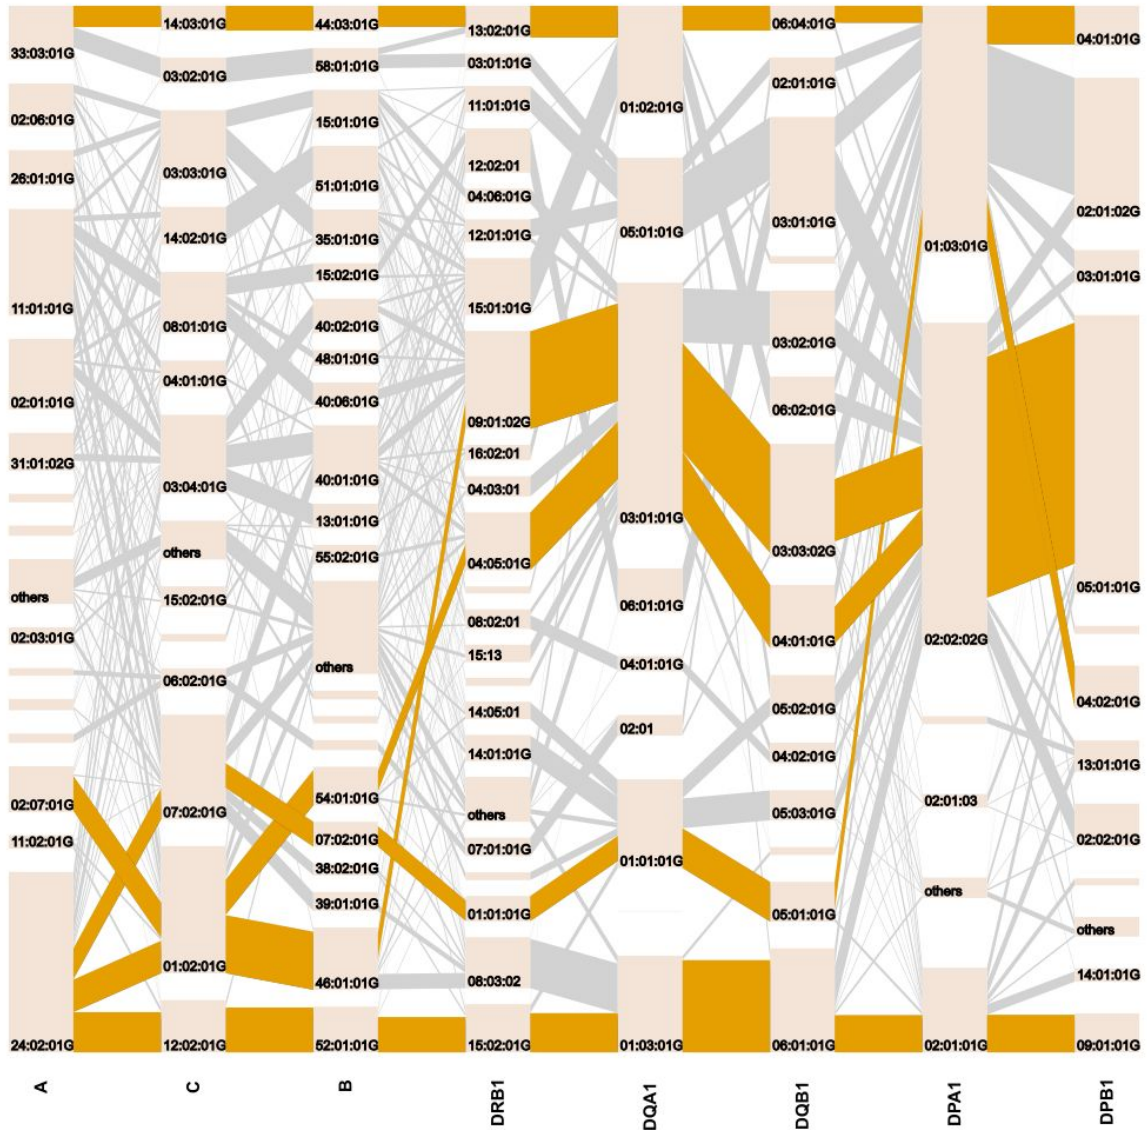

**Supplementary Figure 9. Haplotype structure for eight classical HLA genes in Europeans.**

The haplotype structures of the eight classical HLA genes. The tile in a bar represents an *HLA* allele, and its height corresponds to the frequencies of the *HLA* allele. All long-range *HLA* haplotypes with frequency >1% are bolded and highlighted in blue.

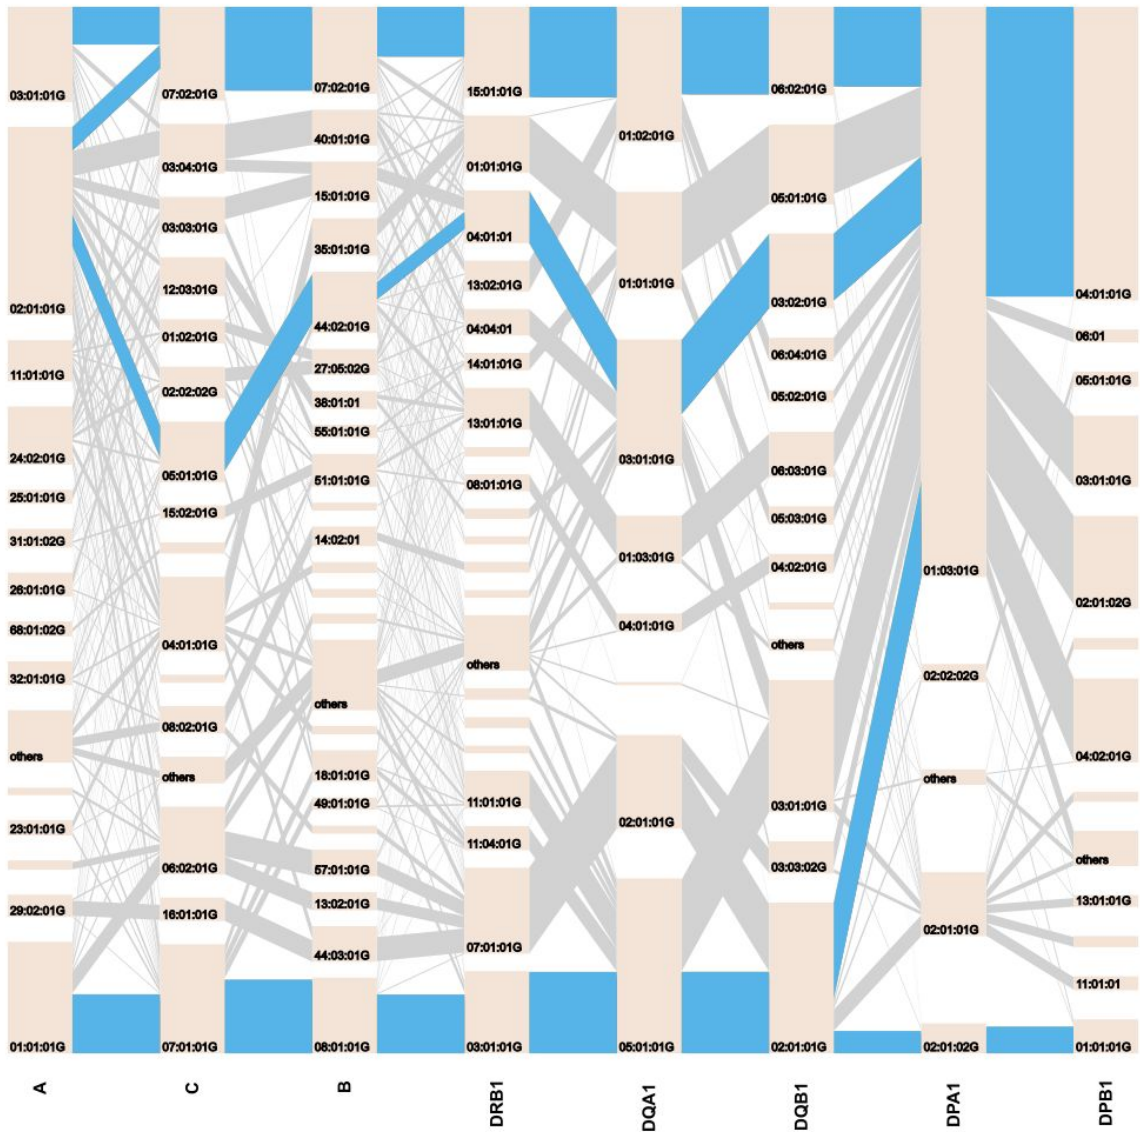

**Supplementary Figure 10. Haplotype structure for eight classical HLA genes in South Asians.** The haplotype structures of the eight classical HLA genes. The tile in a bar represents an *HLA* allele, and its height corresponds to the frequencies of the *HLA* allele. All long-range *HLA* haplotypes with frequency >1% are bolded and highlighted in green.

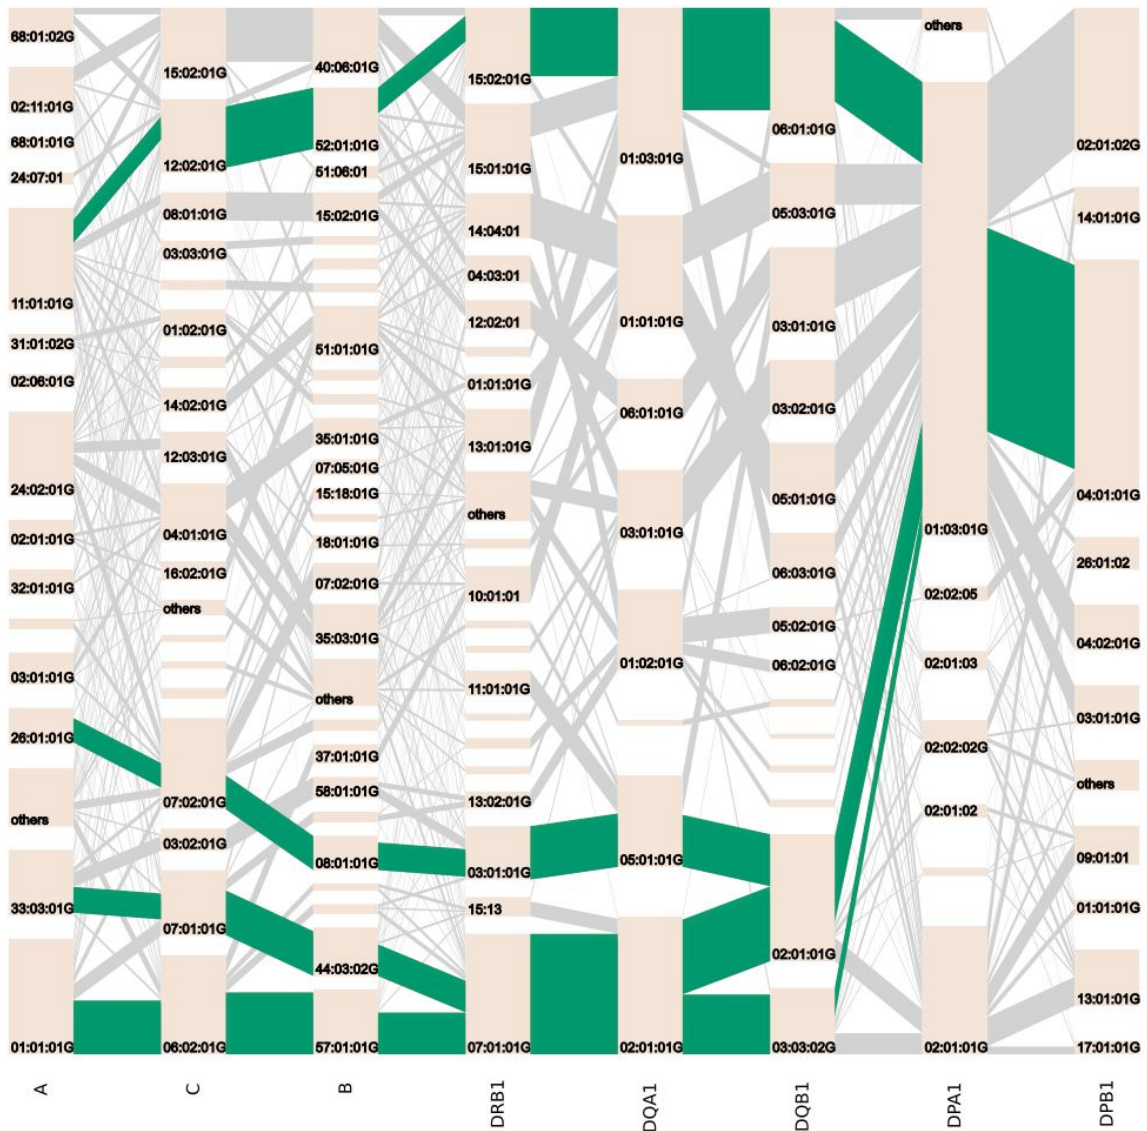



**Supplementary Figure 11. Pairwise LD and haplotype structure for eight classical HLA genes in Admixed Africans.** The haplotype structures of the eight classical HLA genes. The tile in a bar represents an *HLA* allele, and its height corresponds to the frequencies of the *HLA* allele. All long-range *HLA* haplotypes with frequency >1% are bolded and highlighted in purple.

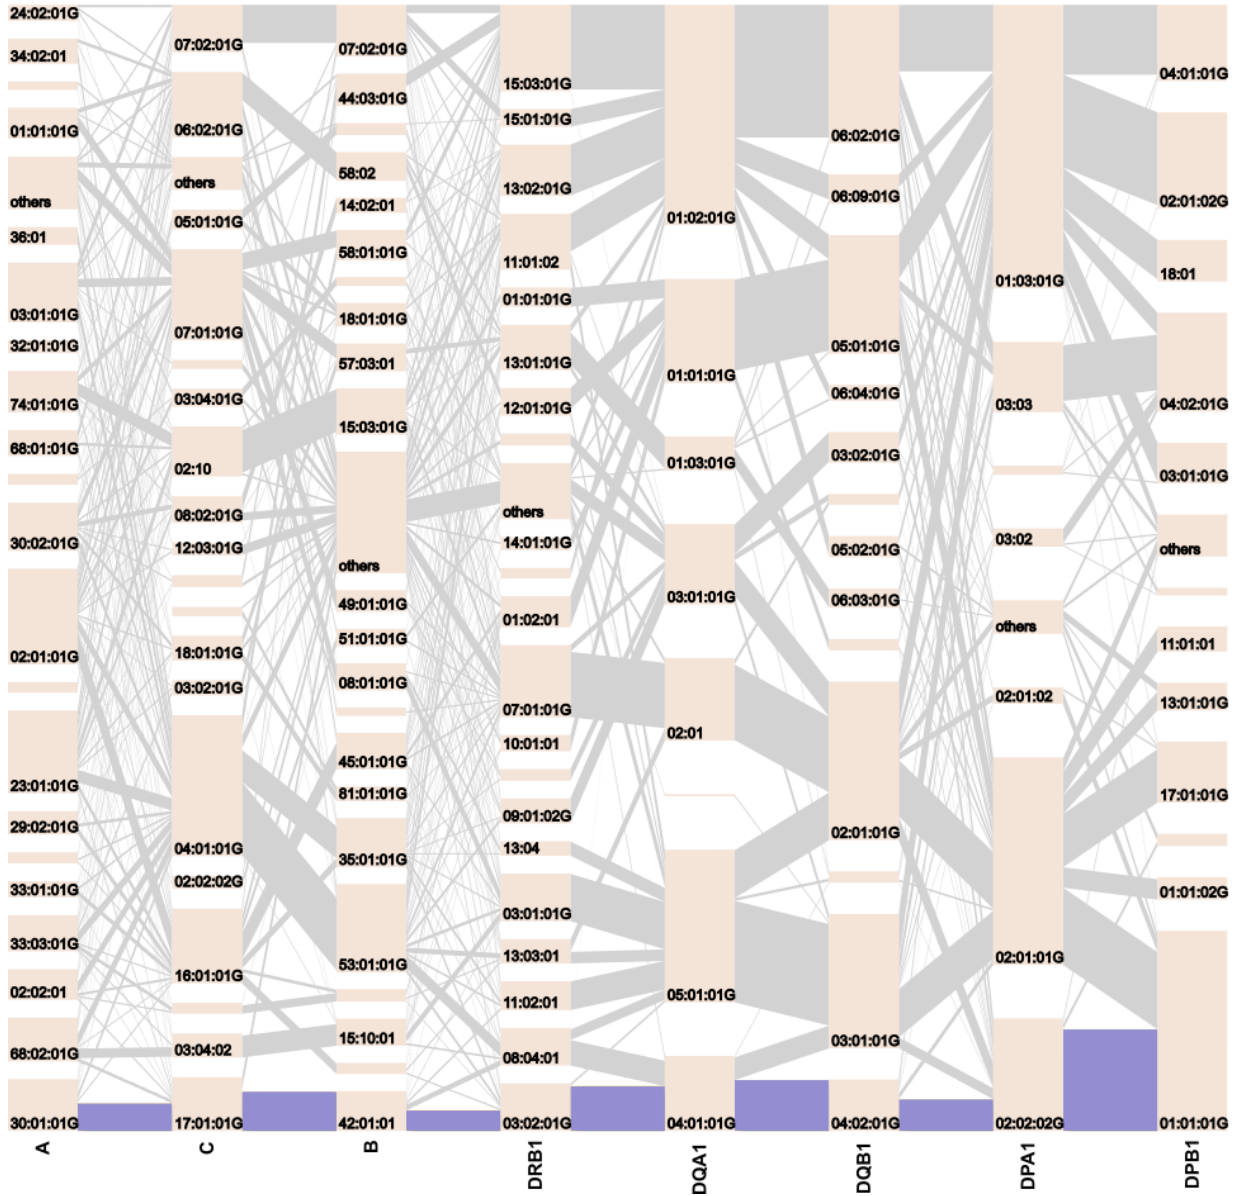





**Supplementary Figure 13. Principal component analysis (PCA) of the MESA GWAS samples.** The genotypes projected onto the first two principal components using SNP weights precomputed from samples in the 1000 Genomes Phase 3 project using SNPweights. Four diverse ancestries were collected in the MESA project - Admixed African (purple); East Asian (yellow); European (blue) and Latino (orange).

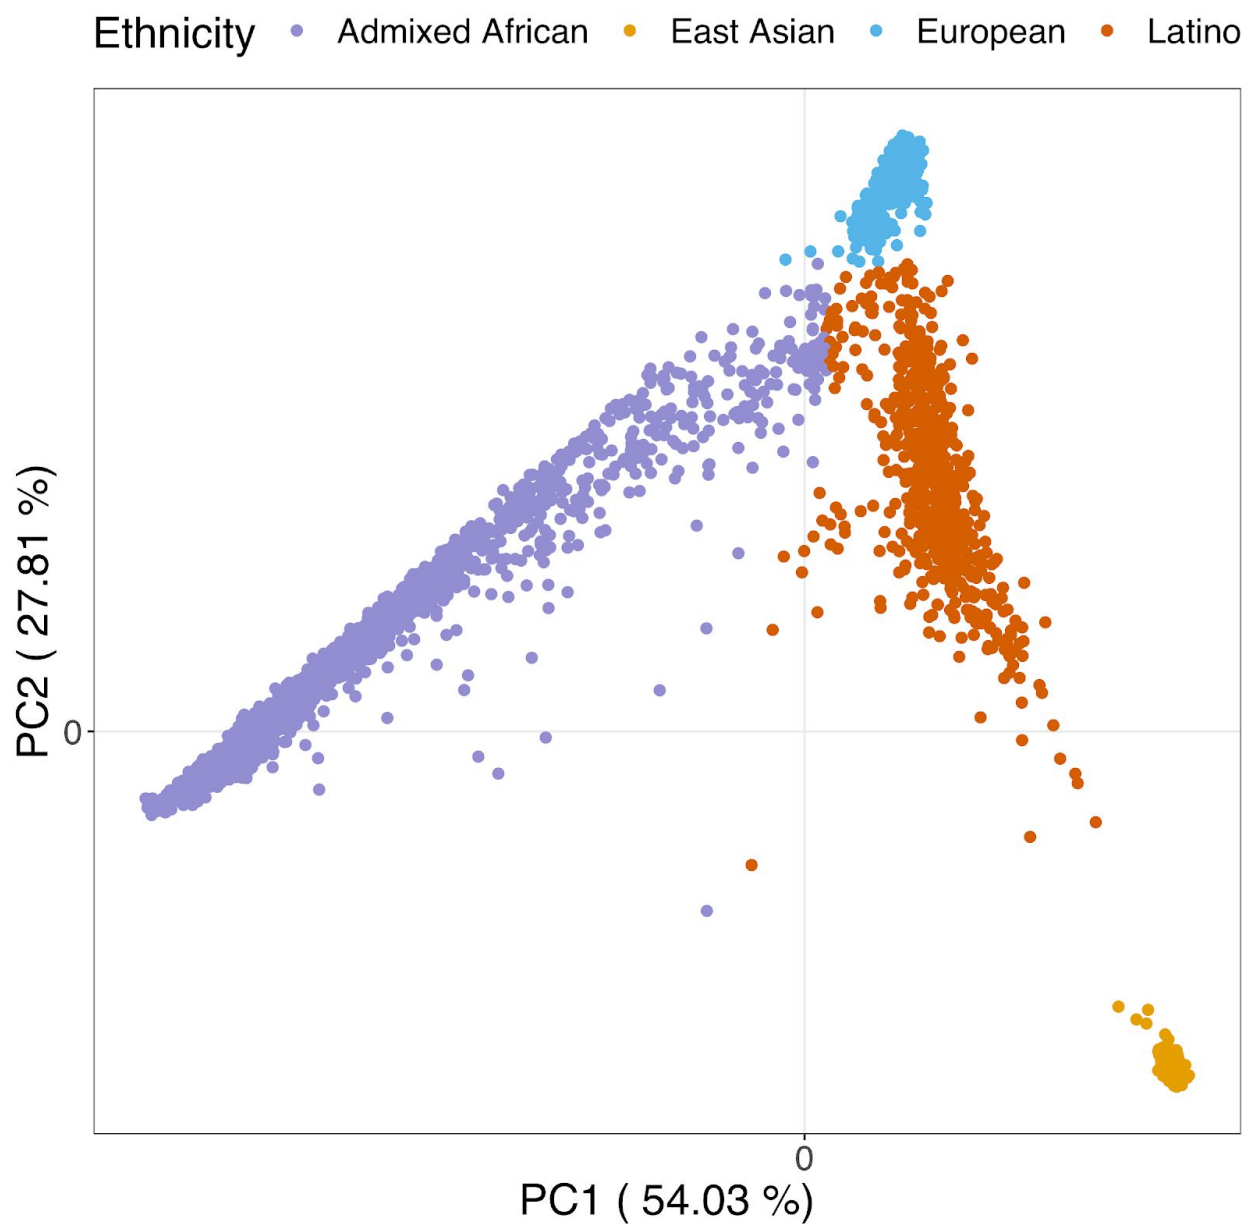

**Supplementary Figure 14. Deviation from average genome-wide ancestry in Admixed African and Latino populations.** The x-axis is the genomic position of Chromosome 6. The y-axis shows the local African ancestry deviation measure inferred at a given position for (a) Admixed Africans and (b) Latinos. The MHC region (chr6:28Mb-34Mb) is highlighted in red shading. Local ancestries were estimated using RFMix<sup>1</sup> (red) and ELAI<sup>2</sup> (blue). The ancestry deviation measure is the difference between African ancestry at a given genomic position with respect to the genome-wide average estimated by ADMIXTURE<sup>3</sup> with K=3, normalized by the standard deviation of the ancestry estimate. The dashed line indicates the genome-wide significance threshold at  $\pm 4.42$  standard deviation of the ancestry estimate deviated from the genome-wide average<sup>4</sup>.

(a)

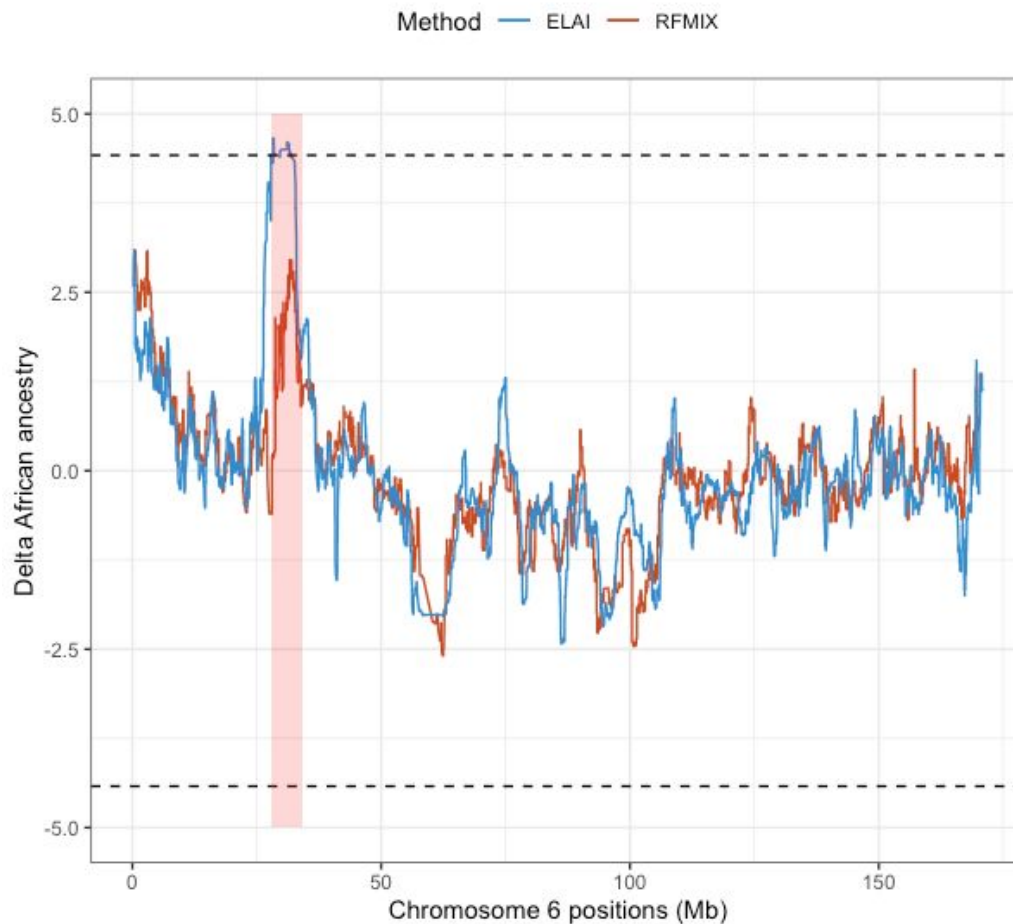

(b)

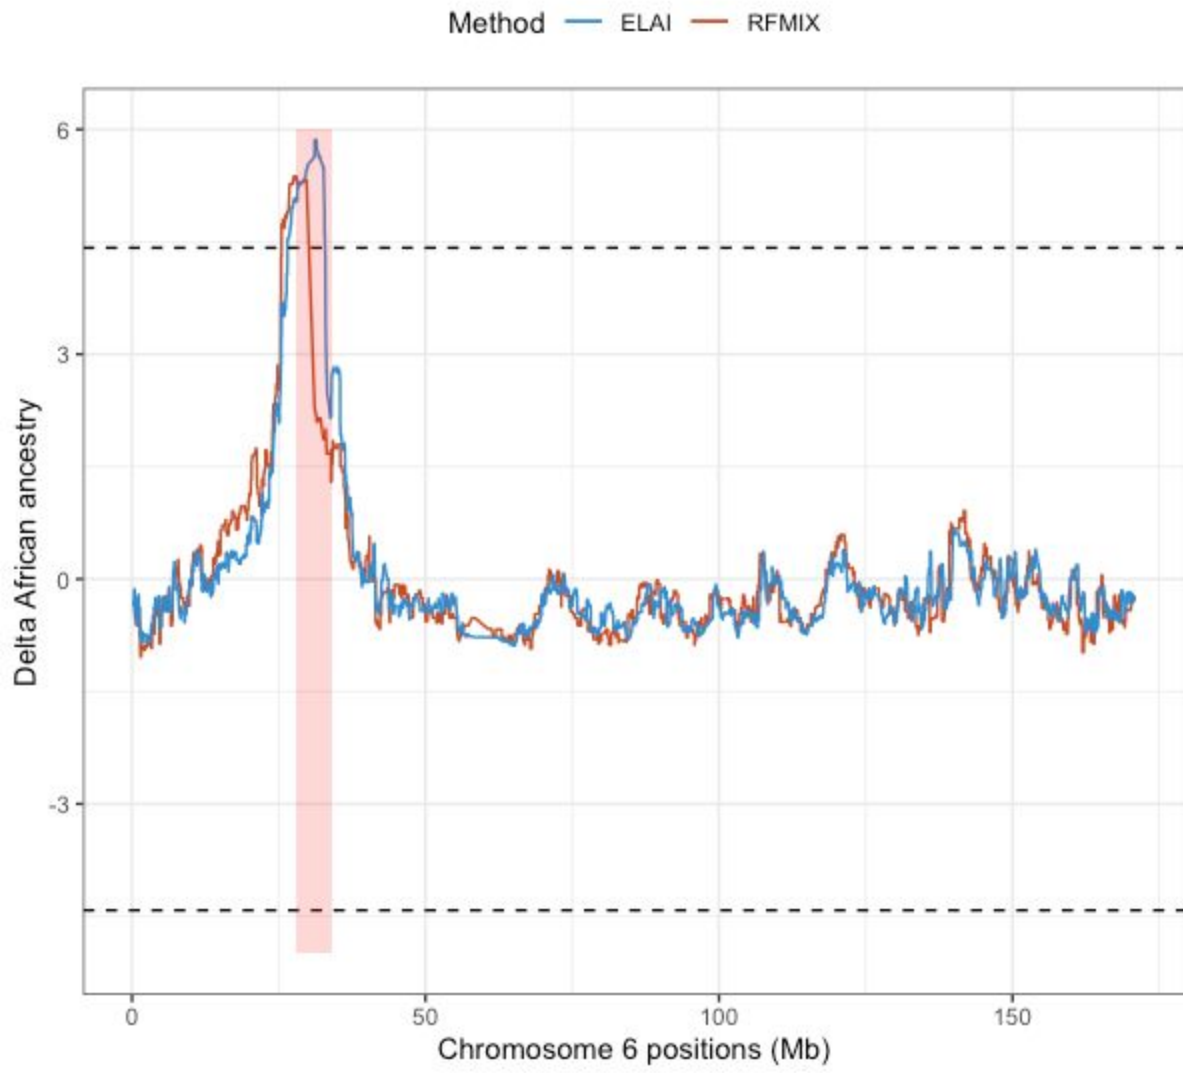

**Supplementary Figure 15. Principal component analysis (PCA) of the GAP registry GWAS samples.** GAP samples are plotted with five 1000 Genomes Phase 3 populations. **(a)** First and second principal components. **(b)** First and third principal components. We randomly selected 25 individuals with African ancestry (purple); 25 with East Asian ancestry (yellow) and 25 with European ancestry (blue) for undergoing gold-standard *HLA* typing (red).

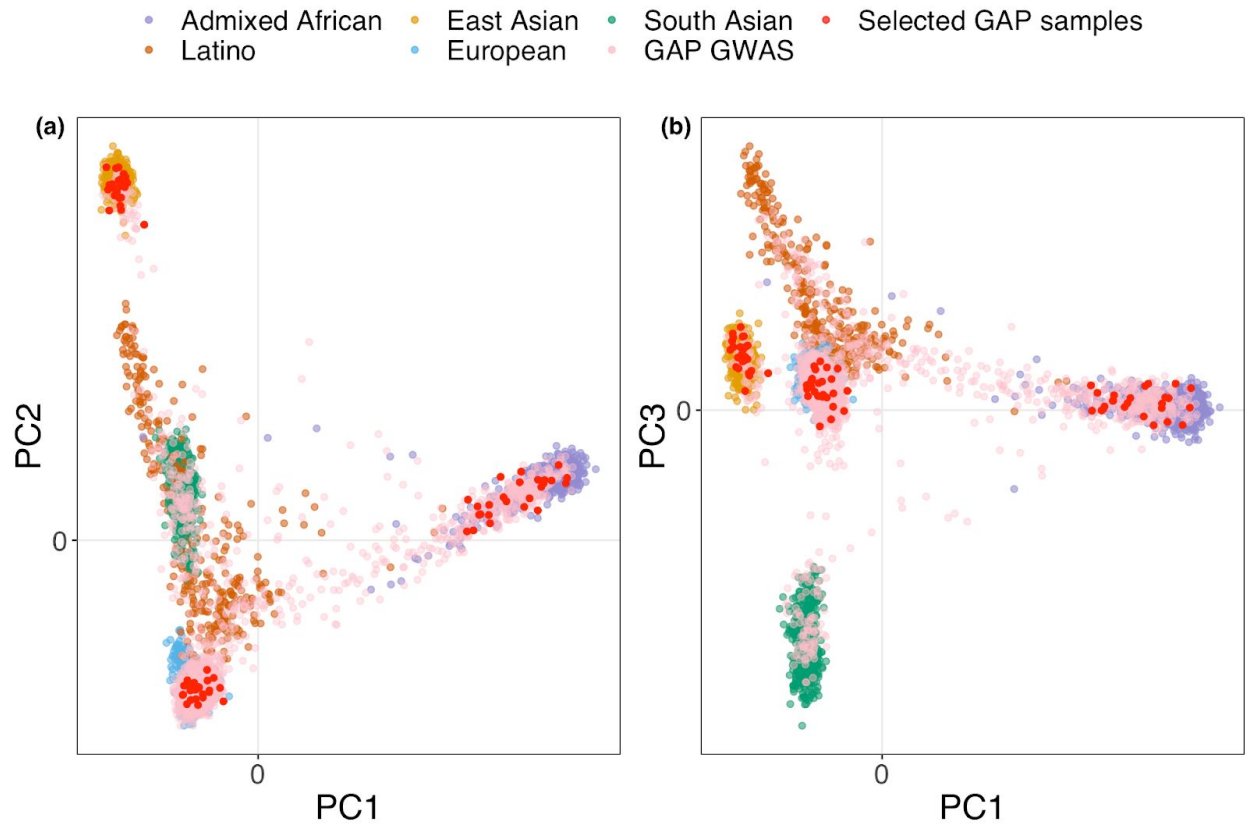

**Supplementary Figure 16. Imputation accuracy of GaP registry GWAS data.** Imputation accuracy measured as the genotype concordance for G-group classical HLA alleles measured in the 75 subjects included in the GAP registry. Accuracy is compared between the whole multi-ethnic HLA reference (dark purple, sample size = 21,546), The Type 1 Diabetes Genetics Consortium<sup>5</sup> (T1DGC) panel that consists of European individuals only (orange, sample size = 5,225).

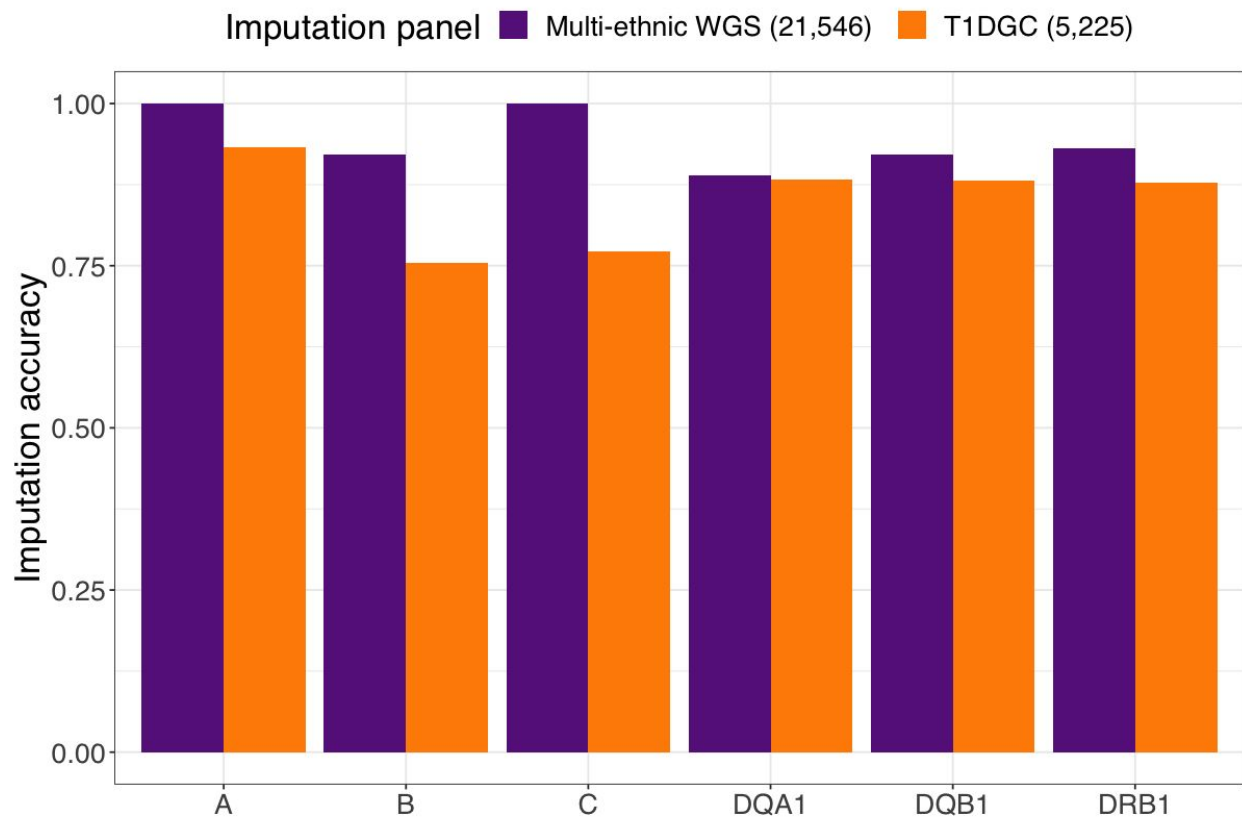



**Supplementary Figure 17. Correlation between imputed and typed dosage (Dosage  $r^2$ ) of classical *HLA* alleles in 1,067 Admixed African HIV-1 samples.** The x-axis shows the minor allele frequency observed in the SBT dataset. Blue points show two-field *HLA* alleles. Red points show one-field *HLA* alleles.

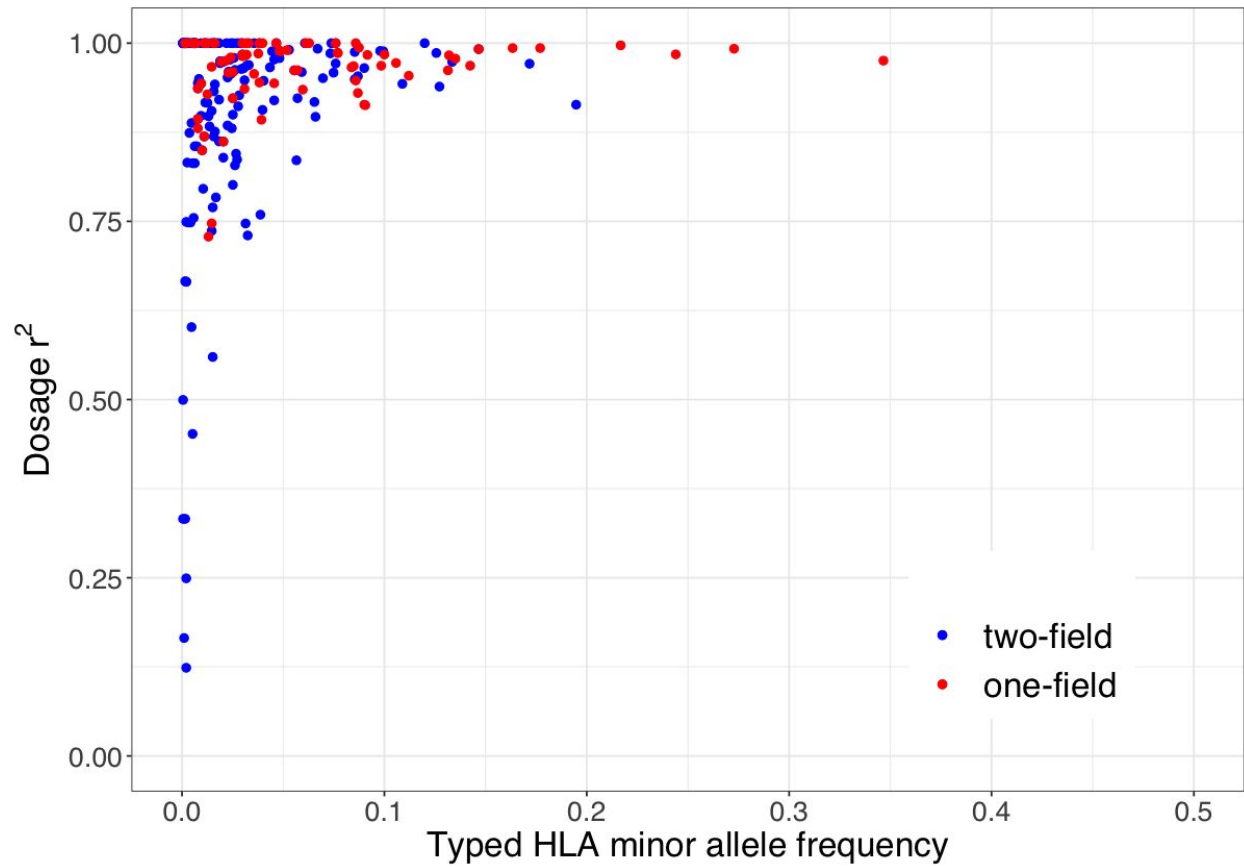

**Supplementary Figure 18. Association tests within the MHC to HIV-1 viral load.** The x-axis shows the genomic positions of chromosome 6 (build 37), and the y-axis is the  $-\log_{10}$  (P-value) obtained from the regression analyses for SNPs (gray), classical *HLA* alleles (blue) and amino acids (red). The dashed black line indicates the genome-wide significance threshold ( $P = 5 \times 10^{-8}$ ). For biallelic markers, results were calculated by a linear regression including sex, cohort-specific principal components and ancestry indicator as covariates (circle). Association at amino acid positions with more than two residues was calculated using a multi-degree-of-freedom omnibus test including the same covariates (diamond). The top associated amino acid, classical *HLA* allele and SNPs are annotated in the figure. (a) Of all variants tested, the top hit maps to amino acid position 97 in HLA-B. (b) Subsequent conditional analysis controlling for all residues at position 97 in HLA-B revealed an independent association at position 67 in HLA-B. (c) Results conditioned on position 97 and 67 in HLA-B showed a third signal at position 156 in HLA-B. (d) Results conditioned on position 97, 67 and 156 in HLA-B showed position 77 in HLA-A has the strongest association signal outside HLA-B among all amino acid positions. (e) Results conditioned on all amino acid positions in HLA-B. Notably, amino acid positions were more significant than any single SNP or classical *HLA* allele in each conditional analysis for the three amino acid positions in HLA-B.

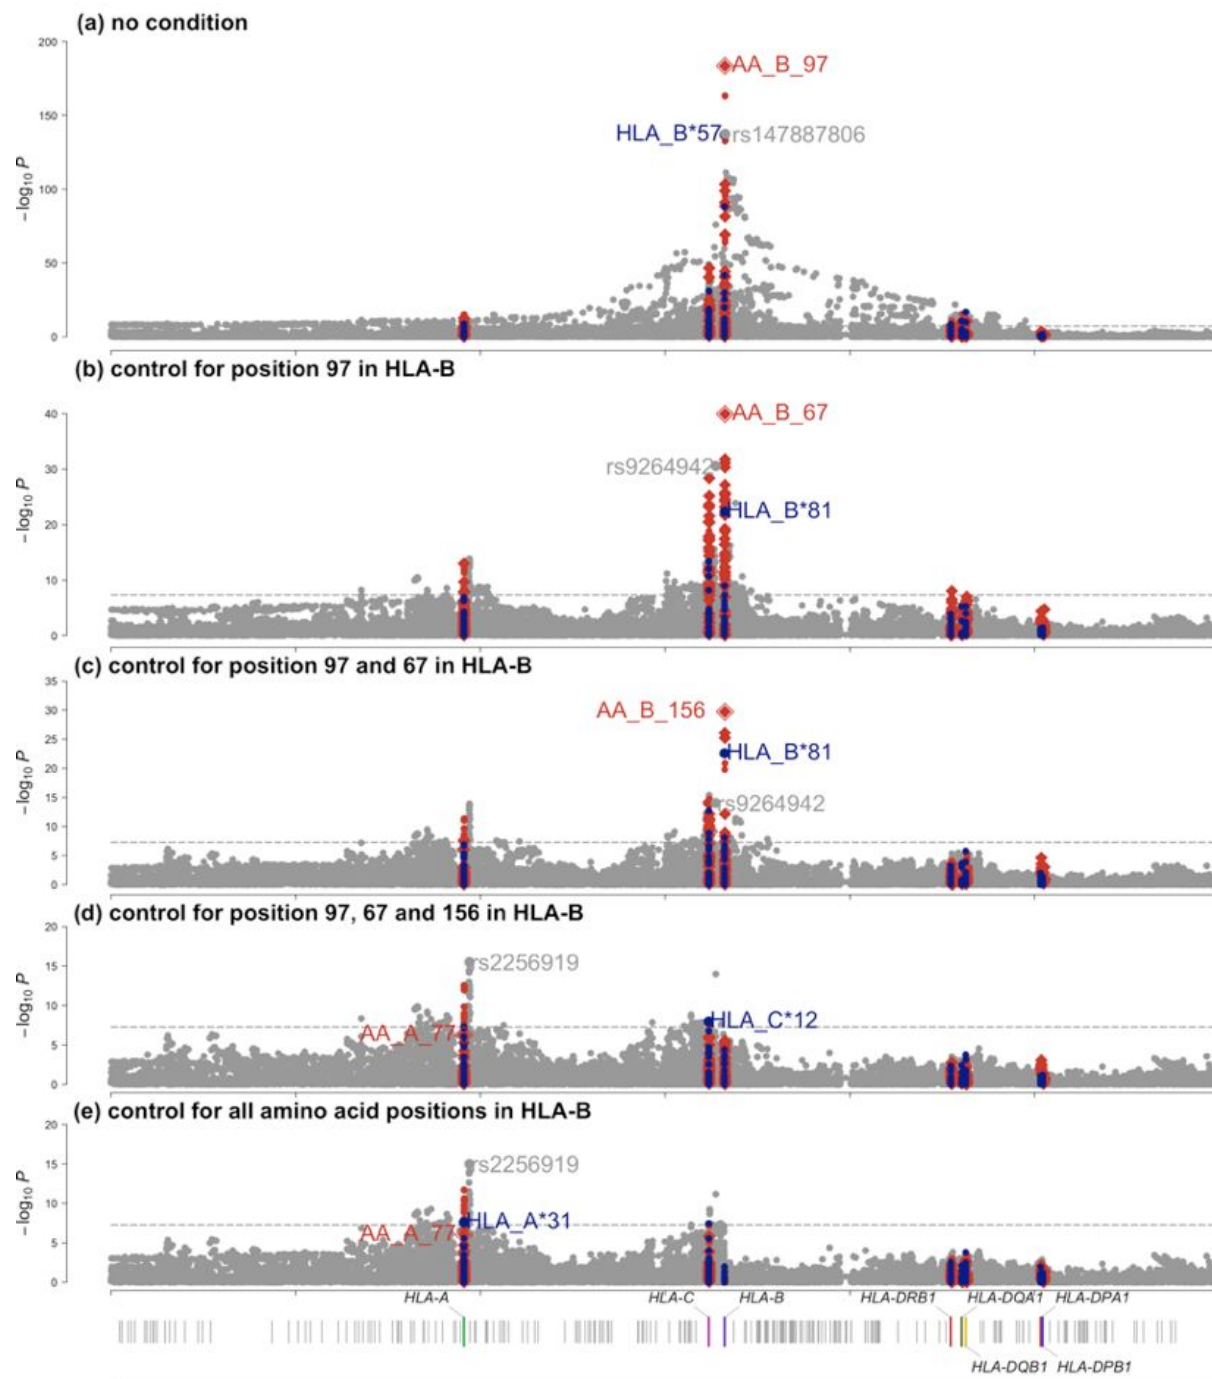

**Supplementary Figure 19. Effect of the most protective residue 97Val in HLA-B across diverse populations.** Change in log<sub>10</sub> HIV-1 set point viral load (spVL, RNA copies per milliliter) of individual amino acid residues at position 97 in HLA-B. Points show the mean of log<sub>10</sub>(spVL) observed in each population with 95% confidence interval (whiskers). Residues range from strongly protective (i.e., viral load decreasing) to risk (viral load increasing) in the overall population.

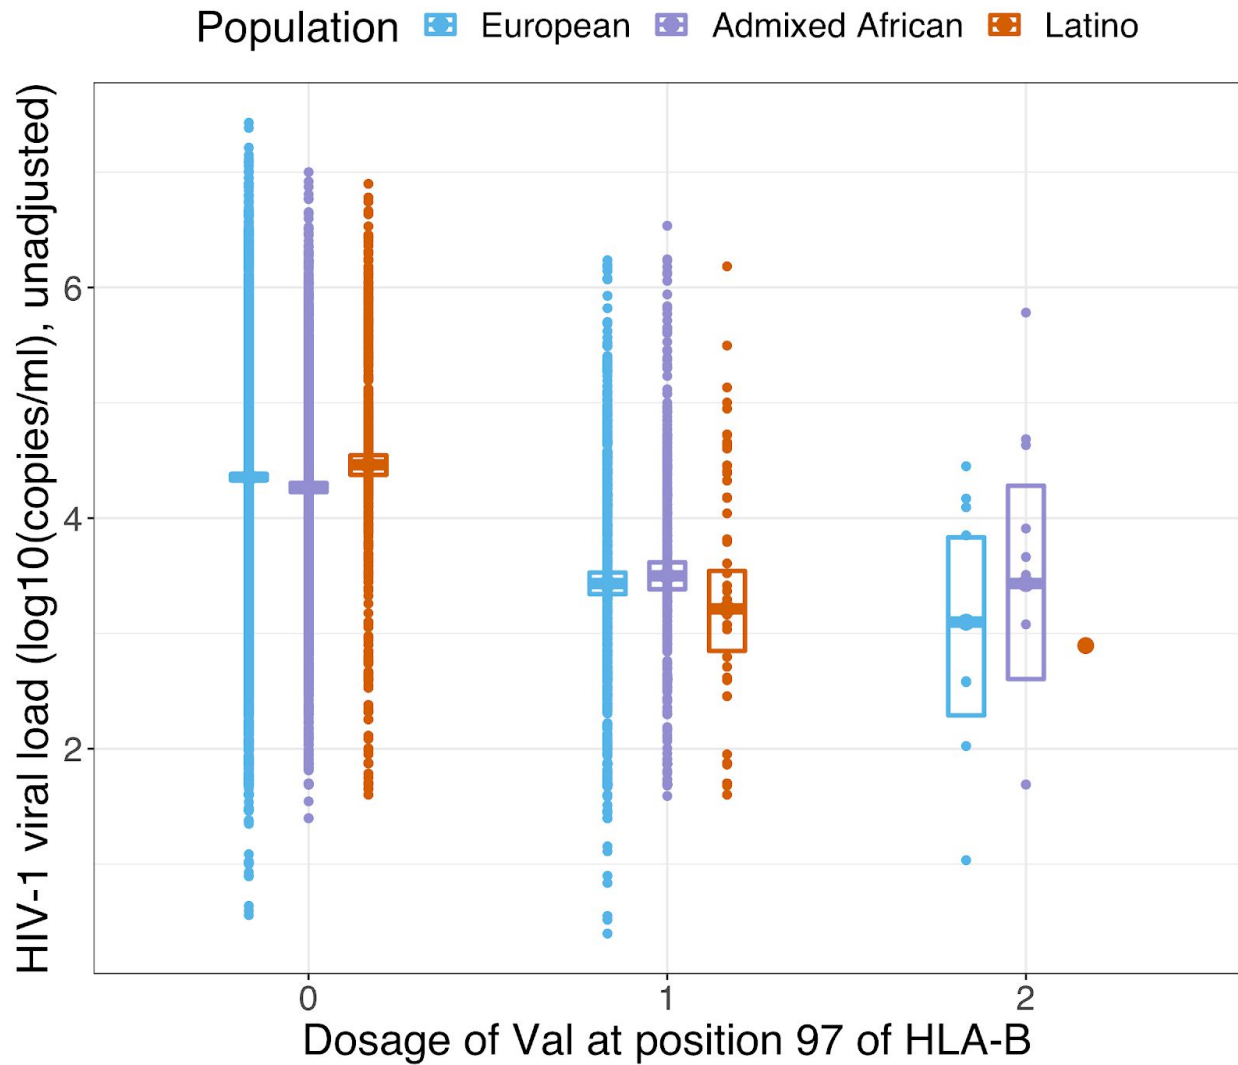

**Supplementary Figure 20. Effect on set point viral load of individual residues at position 97 in HLA-B.** Mean set point viral load (spVL, RNA copies per milliliter) and its standard error of all six residues at position 97 in HLA-B in three populations independently. Residues are ranked from the most protective to the most risky in the overall population.

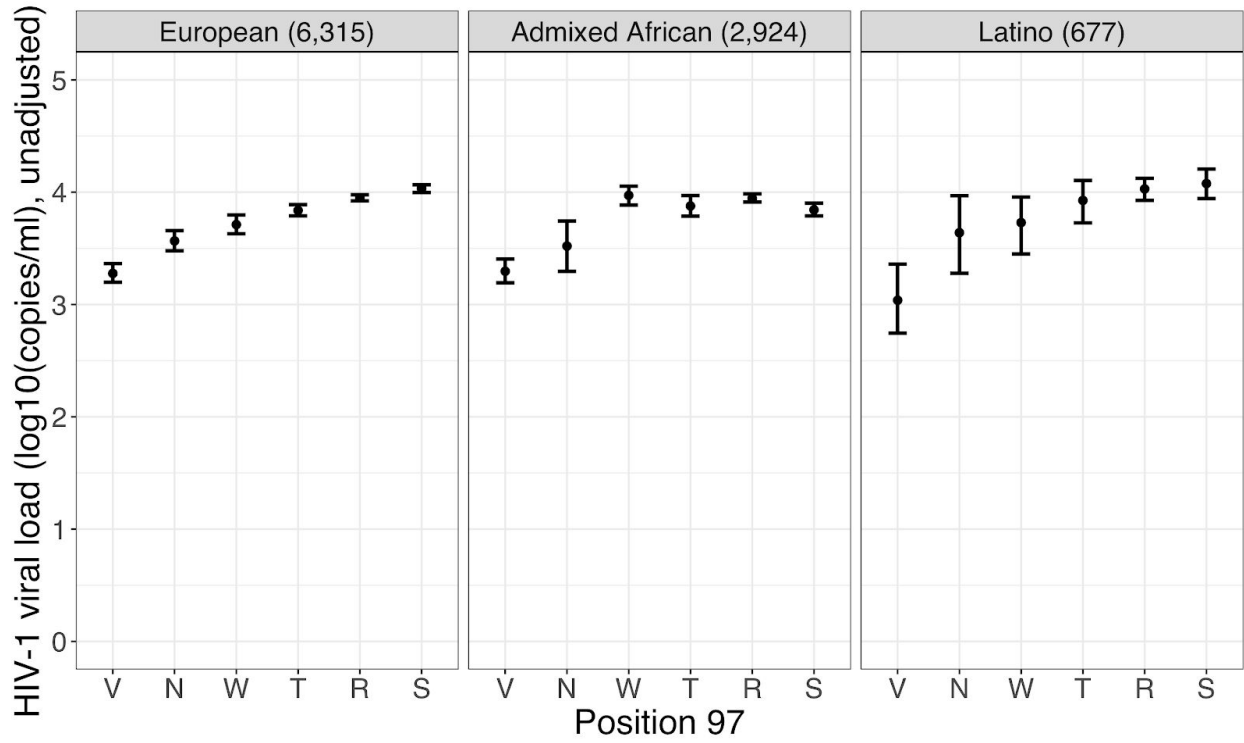

**Supplementary Figure 21. Frequencies in all previously and current reported amino acid positions that are associated with HIV-1 viral load.**

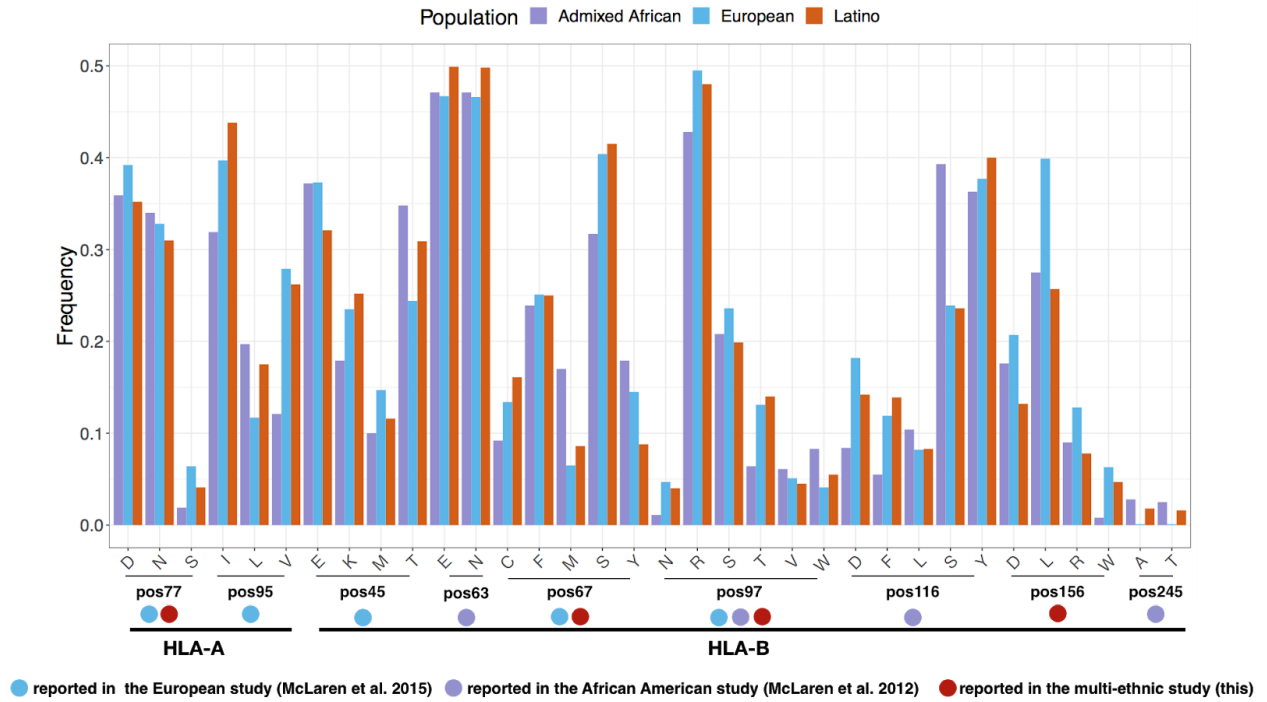



**Supplementary Figure 22. Effect on set point viral load of individual haplotypes formed by amino acid positions 97, 67 and 156 in HLA-B.** Mean viral load and its standard error of the haplotypes with frequency > 1% formed by the three independently associated amino acid positions (97, 67 and 156 in HLA-B) in three populations independently.

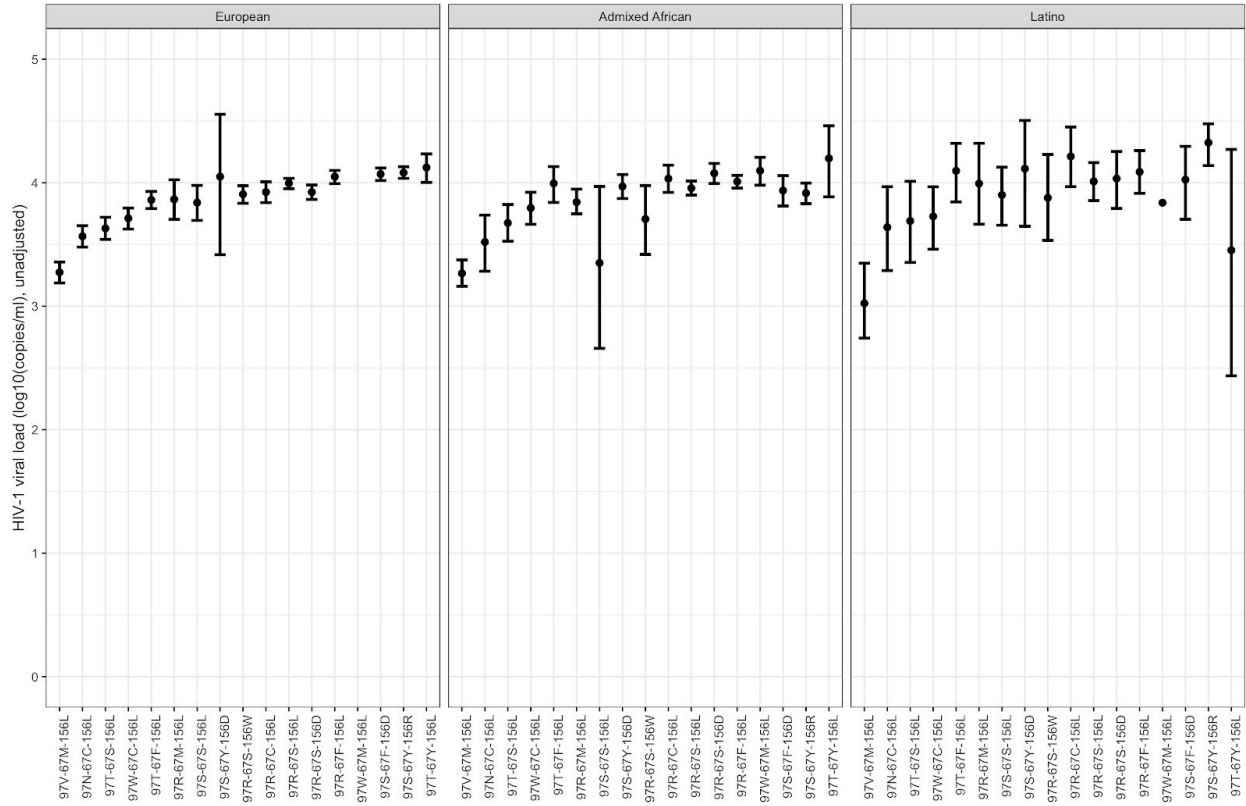

**Supplementary Figure 23. Effect on set point viral load of individual amino acid residues at each position reported in this and previous work<sup>6,7</sup>.** Results were calculated per allele using linear regression models. The x-axis shows the effect size and its standard errors in the joint analysis, and the y-axis shows the effect size and its standard error in individual populations (purple = Admixed American; blue = European and orange = Latino). Different shapes indicate which study an amino acid was reported in.

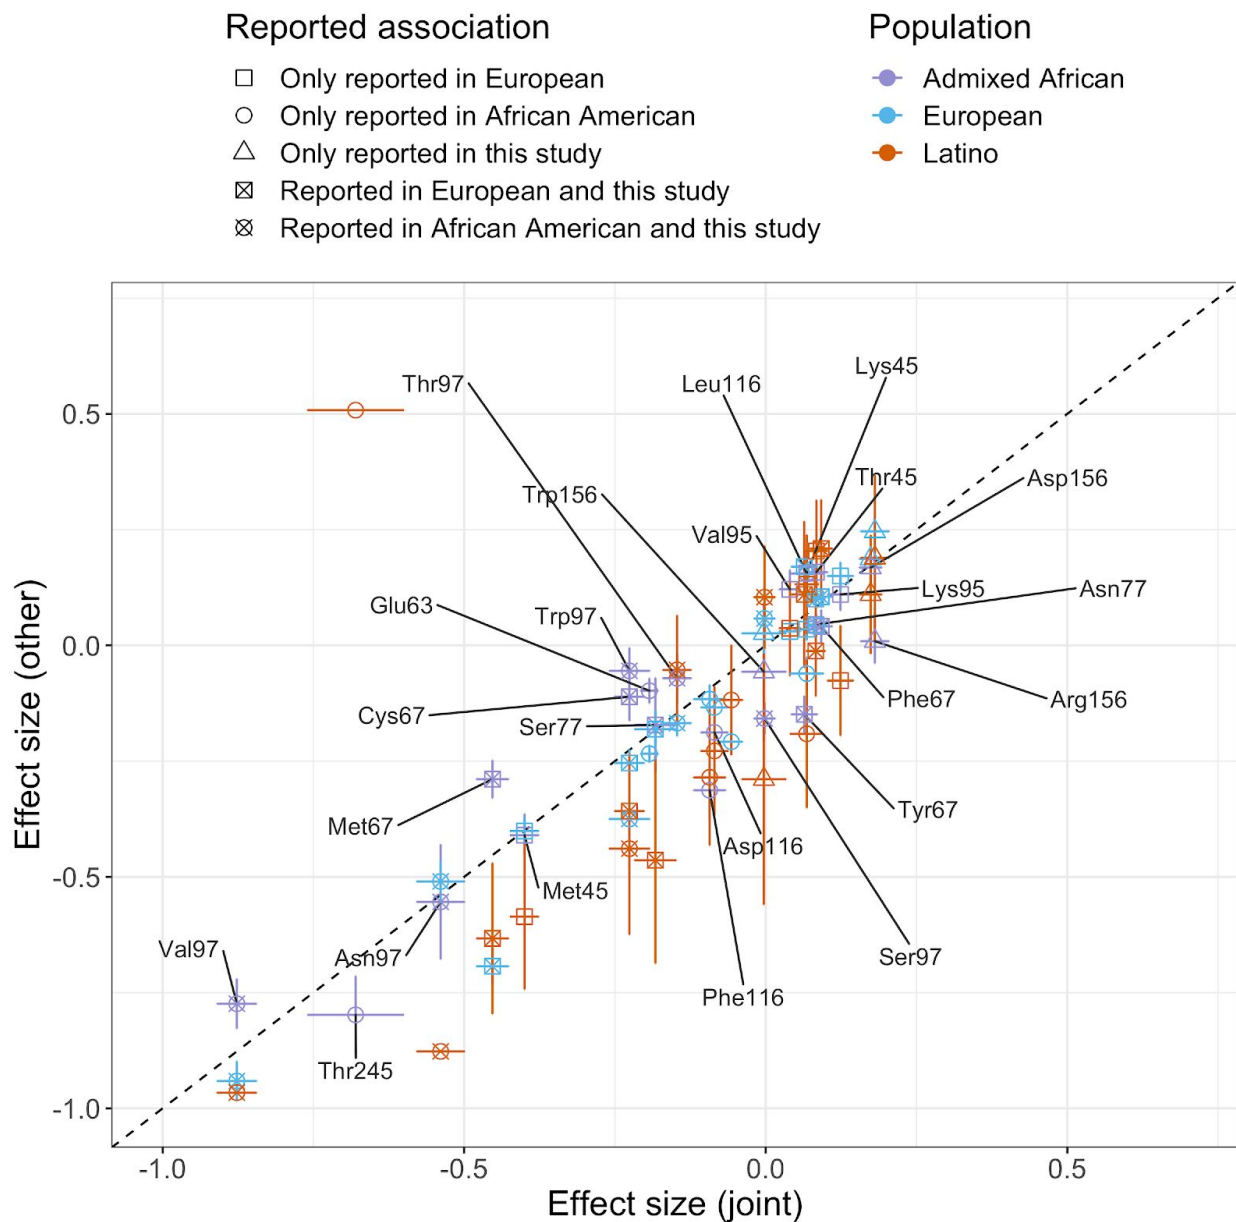

**Supplementary Figure 24. Conditional analysis of other previously reported independently associated amino acid positions.** Manhattan plots of amino acid positions in the six classical HLA genes. Each point shows a single amino acid position and its omnibus P-value after controlling for (a) independent positions that are associated with spVL in this study (position 97, 67 and 156 in HLA-B); and (b) independent positions that are only reported in previous studies<sup>6,7</sup> and not in the presented work (position 45, 63 and 116 in HLA-B and position 77, 95 in HLA-A). Independently associated amino acid positions that are only reported in the European population<sup>7</sup> are shown in blue. Independently associated amino acid positions that are only reported in the African American population<sup>6</sup> are shown in purple. Independently associated amino acid positions identified in this study are shown in red.

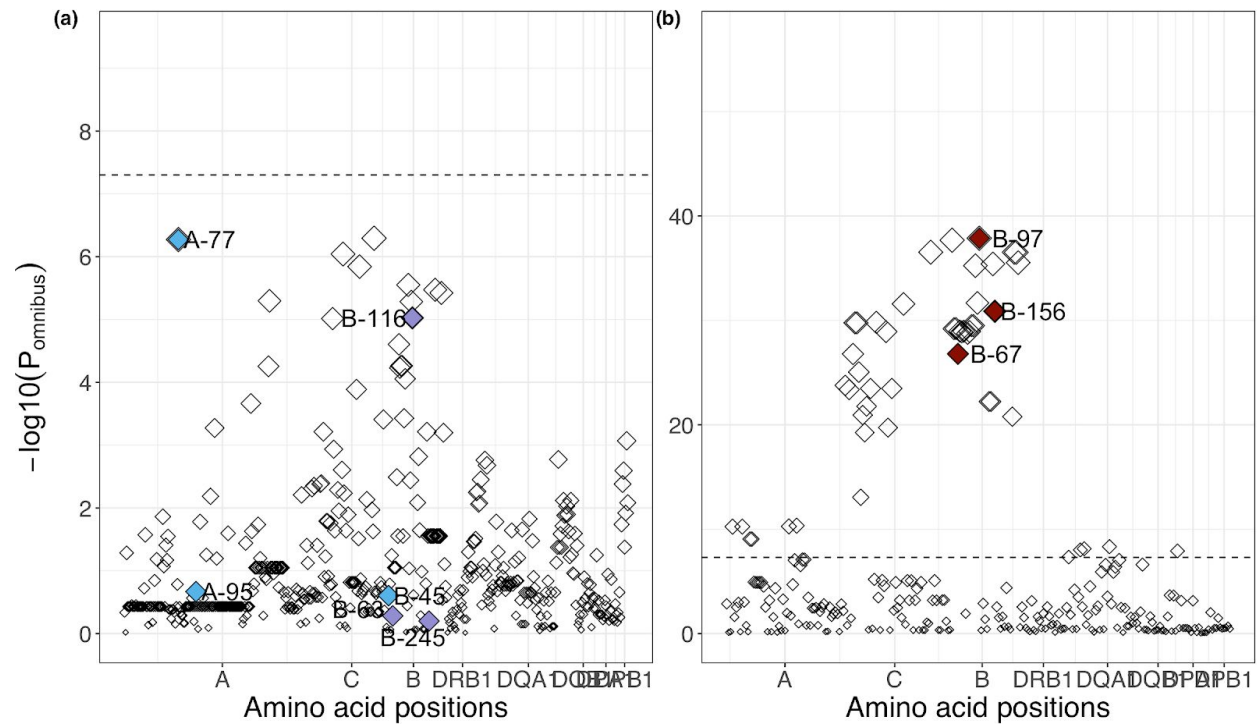

## References

1. Maples, B. K., Gravel, S., Kenny, E. E. & Bustamante, C. D. RFMix: a discriminative modeling approach for rapid and robust local-ancestry inference. *Am. J. Hum. Genet.* **93**, 278–288 (2013).
2. Zhou, Q., Zhao, L. & Guan, Y. Strong Selection at MHC in Mexicans since Admixture. *PLoS Genet.* **12**, e1005847 (2016).
3. Alexander, D. H., Novembre, J. & Lange, K. Fast model-based estimation of ancestry in unrelated individuals. *Genome Res.* **19**, 1655–1664 (2009).
4. Bhatia, G. et al. Genome-wide scan of 29,141 African Americans finds no evidence of directional selection since admixture. *Am. J. Hum. Genet.* **95**, 437–444 (2014).
5. Jia, X. et al. Imputing amino acid polymorphisms in human leukocyte antigens. *PLoS One* **8**, e64683 (2013).
6. McLaren, P. J. et al. Fine-mapping classical HLA variation associated with durable host control of HIV-1 infection in African Americans. *Hum. Mol. Genet.* **21**, 4334–4347 (2012).
7. McLaren, P. J. et al. Polymorphisms of large effect explain the majority of the host genetic contribution to variation of HIV-1 virus load. *Proc. Natl. Acad. Sci. U. S. A.* **112**, 14658–14663 (2015).
